# Supplementary material
Source: ML conference proceedings conference paper supplement (https://proceedings.mlr.press/v139/yuan21a.html)
Supplement: Supplementary file [file yuan21a-supp.pdf]

## A. Auxiliary Lemmas

Noting all algorithms discussed in the paper including the baselines implement a stagewise framework, we define the duality gap of  $s$ -th stage at a point  $(\mathbf{v}, \alpha)$  as

$$Gap_s(\mathbf{v}, \alpha) = \max_{\alpha'} f^s(\mathbf{v}, \alpha') - \min_{\mathbf{v}'} f^s(\mathbf{v}', \alpha). \quad (8)$$

Before we show the proofs, we first present the lemmas from (Yan et al., 2020).

**Lemma 3** (Lemma 1 of (Yan et al., 2020)). *Suppose a function  $h(\mathbf{v}, \alpha)$  is  $\lambda_1$ -strongly convex in  $\mathbf{v}$  and  $\lambda_2$ -strongly concave in  $\alpha$ . Consider the following problem*

$$\min_{\mathbf{v} \in X} \max_{\alpha \in Y} h(\mathbf{v}, \alpha),$$

where  $X$  and  $Y$  are convex compact sets. Denote  $\hat{\mathbf{v}}_h(\alpha) = \arg \min_{\mathbf{v}' \in X} h(\mathbf{v}', \alpha)$  and  $\hat{\alpha}_h(\mathbf{v}) = \arg \max_{\alpha' \in Y} h(\mathbf{v}, \alpha')$ . Suppose we have two solutions  $(\mathbf{v}_0, \alpha_0)$  and  $(\mathbf{v}_1, \alpha_1)$ . Then the following relation between variable distance and duality gap holds

$$\begin{aligned} \frac{\lambda_1}{4} \|\hat{\mathbf{v}}_h(\alpha_1) - \mathbf{v}_0\|^2 + \frac{\lambda_2}{4} \|\hat{\alpha}_h(\mathbf{v}_1) - \alpha_0\|^2 &\leq \max_{\alpha' \in Y} h(\mathbf{v}_0, \alpha') - \min_{\mathbf{v}' \in X} h(\mathbf{v}', \alpha_0) \\ &\quad + \max_{\alpha' \in Y} h(\mathbf{v}_1, \alpha') - \min_{\mathbf{v}' \in X} h(\mathbf{v}', \alpha_1). \end{aligned} \quad (9)$$

□

**Lemma 4** (Lemma 5 of (Yan et al., 2020)). *We have the following lower bound for  $Gap_s(\mathbf{v}_s, \alpha_s)$*

$$Gap_s(\mathbf{v}_s, \alpha_s) \geq \frac{3}{50} Gap_{s+1}(\mathbf{v}_0^{s+1}, \alpha_0^{s+1}) + \frac{4}{5} (\phi(\mathbf{v}_0^{s+1}) - \phi(\mathbf{v}_0^s)),$$

where  $\mathbf{v}_0^{s+1} = \mathbf{v}_s$  and  $\alpha_0^{s+1} = \alpha_s$ , i.e., the initialization of  $(s+1)$ -th stage is the output of the  $s$ -th stage.

□

## B. Analysis of CODA+

The proof sketch is similar to the proof of CODA in (Guo et al., 2020a). However, there are two noticeable differences from (Guo et al., 2020a). First, in Lemma 1, we bound the duality gap instead of the objective gap in (Guo et al., 2020a). This is because the analysis later in this proof requires the bound of the duality gap.

Second, in Lemma 1, where the bound for homogeneous data is better than that of heterogeneous data. The better analysis for homogeneous data is inspired by the analysis in (Yu et al., 2019a), which tackles a minimization problem. Note that  $f^s$  denotes the subproblem for stage  $s$ , we omit the index  $s$  in variables when the context is clear.

### B.1. Lemmas

We need following lemmas for the proof. The Lemma 5, Lemma 6 and Lemma 7 are similar to Lemma 3, Lemma 4 and Lemma 5 of (Guo et al., 2020a), respectively. For the sake of completeness, we will include the proof of Lemma 5 and Lemma 6 since a change in the update of the primal variable.

**Lemma 5.** *Define  $\bar{\mathbf{v}}_t = \frac{1}{K} \sum_{k=1}^N \mathbf{v}_t^k$ ,  $\bar{\alpha}_t = \frac{1}{K} \sum_{k=1}^N \alpha_t^k$ . Suppose Assumption 1 holds and by running Algorithm 2, we have for any  $\mathbf{v}, \alpha$ ,*

$$\begin{aligned} f^s(\bar{\mathbf{v}}, \alpha) - f^s(\mathbf{v}, \bar{\alpha}) &\leq \frac{1}{T} \sum_{t=1}^T \left[ \underbrace{\langle \nabla_{\mathbf{v}} f(\bar{\mathbf{v}}_{t-1}, \bar{\alpha}_{t-1}), \bar{\mathbf{v}}_t - \mathbf{v} \rangle}_{B_1} + \underbrace{\langle \nabla_{\alpha} f(\bar{\mathbf{v}}_{t-1}, \bar{\alpha}_{t-1}), \bar{\alpha}_t - \alpha \rangle}_{B_2} \right] \\ &\quad + \underbrace{\frac{3\ell + 3\ell^2/\mu_2}{2} \|\bar{\mathbf{v}}_t - \bar{\mathbf{v}}_{t-1}\|^2 + 2\ell(\bar{\alpha}_t - \bar{\alpha}_{t-1})^2 - \frac{\ell}{3} \|\bar{\mathbf{v}}_t - \mathbf{v}\|^2 - \frac{\mu_2}{3} (\bar{\alpha}_{t-1} - \alpha)^2}_{B_3}, \end{aligned}$$

where  $\mu_2 = 2p(1-p)$  is the strong concavity coefficient of  $f(\mathbf{v}, \alpha)$  in  $\alpha$ .

*Proof.* For any  $\mathbf{v}$  and  $\alpha$ , using Jensen's inequality and the fact that  $f^s(\mathbf{v}, \alpha)$  is convex in  $\mathbf{v}$  and concave in  $\alpha$ ,

$$f^s(\bar{\mathbf{v}}, \alpha) - f^s(\mathbf{v}, \bar{\alpha}) \leq \frac{1}{T} \sum_{t=1}^T (f^s(\bar{\mathbf{v}}_t, \alpha) - f^s(\mathbf{v}, \bar{\alpha}_t)) \quad (10)$$

By  $\ell$ -strongly convexity of  $f^s(\mathbf{v}, \alpha)$  in  $\mathbf{v}$ , we have

$$f^s(\bar{\mathbf{v}}_{t-1}, \bar{\alpha}_{t-1}) + \langle \partial_{\mathbf{v}} f^s(\bar{\mathbf{v}}_{t-1}, \bar{\alpha}_{t-1}), \mathbf{v} - \bar{\mathbf{v}}_{t-1} \rangle + \frac{\ell}{2} \|\bar{\mathbf{v}}_{t-1} - \mathbf{v}\|^2 \leq f(\mathbf{v}, \bar{\alpha}_{t-1}). \quad (11)$$

By  $3\ell$ -smoothness of  $f^s(\mathbf{v}, \alpha)$  in  $\mathbf{v}$ , we have

$$\begin{aligned} f^s(\bar{\mathbf{v}}_t, \alpha) &\leq f^s(\bar{\mathbf{v}}_{t-1}, \alpha) + \langle \partial_{\mathbf{v}} f^s(\bar{\mathbf{v}}_{t-1}, \alpha), \bar{\mathbf{v}}_t - \bar{\mathbf{v}}_{t-1} \rangle + \frac{3\ell}{2} \|\bar{\mathbf{v}}_t - \bar{\mathbf{v}}_{t-1}\|^2 \\ &= f^s(\bar{\mathbf{v}}_{t-1}, \alpha) + \langle \partial_{\mathbf{v}} f^s(\bar{\mathbf{v}}_{t-1}, \bar{\alpha}_{t-1}), \bar{\mathbf{v}}_t - \bar{\mathbf{v}}_{t-1} \rangle + \frac{3\ell}{2} \|\bar{\mathbf{v}}_t - \bar{\mathbf{v}}_{t-1}\|^2 \\ &\quad + \langle \partial_{\mathbf{v}} f^s(\bar{\mathbf{v}}_{t-1}, \alpha) - \partial_{\mathbf{v}} f^s(\bar{\mathbf{v}}_{t-1}, \bar{\alpha}_{t-1}), \bar{\mathbf{v}}_t - \bar{\mathbf{v}}_{t-1} \rangle \\ &\stackrel{(a)}{\leq} f^s(\bar{\mathbf{v}}_{t-1}, \alpha) + \langle \partial_{\mathbf{v}} f^s(\bar{\mathbf{v}}_{t-1}, \bar{\alpha}_{t-1}), \bar{\mathbf{v}}_t - \bar{\mathbf{v}}_{t-1} \rangle + \frac{3\ell}{2} \|\bar{\mathbf{v}}_t - \bar{\mathbf{v}}_{t-1}\|^2 \\ &\quad + \ell |\bar{\alpha}_{t-1} - \alpha| \|\bar{\mathbf{v}}_t - \bar{\mathbf{v}}_{t-1}\| \\ &\stackrel{(b)}{\leq} f^s(\bar{\mathbf{v}}_{t-1}, \alpha) + \langle \partial_{\mathbf{v}} f^s(\bar{\mathbf{v}}_{t-1}, \bar{\alpha}_{t-1}), \bar{\mathbf{v}}_t - \bar{\mathbf{v}}_{t-1} \rangle + \frac{3\ell}{2} \|\bar{\mathbf{v}}_t - \bar{\mathbf{v}}_{t-1}\|^2 \\ &\quad + \frac{\mu_2}{6} (\bar{\alpha}_{t-1} - \alpha)^2 + \frac{3\ell^2}{2\mu_2} \|\bar{\mathbf{v}}_t - \bar{\mathbf{v}}_{t-1}\|^2, \end{aligned} \quad (12)$$

where (a) holds because that we know  $\partial_{\mathbf{v}} f(\mathbf{v}, \alpha)$  is  $\ell$ -Lipschitz in  $\alpha$  since  $f(\mathbf{v}, \alpha)$  is  $\ell$ -smooth, (b) holds by Young's inequality, and  $\mu_2 = 2p(1-p)$  is the strong concavity coefficient of  $f^s$  in  $\alpha$ .

Adding (11) and (12), rearranging terms, we have

$$\begin{aligned} &f^s(\bar{\mathbf{v}}_{t-1}, \bar{\alpha}_{t-1}) + f^s(\bar{\mathbf{v}}_t, \alpha) \\ &\leq f(\mathbf{v}, \bar{\alpha}_{t-1}) + f(\bar{\mathbf{v}}_{t-1}, \alpha) + \langle \partial_{\mathbf{v}} f(\bar{\mathbf{v}}_{t-1}, \bar{\alpha}_{t-1}), \bar{\mathbf{v}}_t - \mathbf{v} \rangle + \frac{3\ell + 3\ell^2/\mu_2}{2} \|\bar{\mathbf{v}}_t - \bar{\mathbf{v}}_{t-1}\|^2 \\ &\quad - \frac{\ell}{2} \|\bar{\mathbf{v}}_{t-1} - \mathbf{v}\|^2 + \frac{\mu_2}{6} (\bar{\alpha}_{t-1} - \alpha)^2. \end{aligned} \quad (13)$$

We know  $f^s(\mathbf{v}, \alpha)$  is  $\mu_2$ -strong concavity in  $\alpha$  ( $-f(\mathbf{v}, \alpha)$  is  $\mu_2$ -strong convexity of in  $\alpha$ ). Thus, we have

$$-f^s(\bar{\mathbf{v}}_{t-1}, \bar{\alpha}_{t-1}) - \partial_{\alpha} f^s(\bar{\mathbf{v}}_{t-1}, \bar{\alpha}_{t-1})^\top (\alpha - \bar{\alpha}_{t-1}) + \frac{\mu_2}{2} (\alpha - \bar{\alpha}_{t-1})^2 \leq -f^s(\bar{\mathbf{v}}_{t-1}, \alpha). \quad (14)$$

Since  $f(\mathbf{v}, \alpha)$  is  $\ell$ -smooth in  $\alpha$ , we get

$$\begin{aligned} -f^s(\mathbf{v}, \bar{\alpha}_t) &\leq -f^s(\mathbf{v}, \bar{\alpha}_{t-1}) - \langle \partial_{\alpha} f^s(\mathbf{v}, \bar{\alpha}_{t-1}), \bar{\alpha}_t - \bar{\alpha}_{t-1} \rangle + \frac{\ell}{2} (\bar{\alpha}_t - \bar{\alpha}_{t-1})^2 \\ &= -f^s(\mathbf{v}, \bar{\alpha}_{t-1}) - \langle \partial_{\alpha} f^s(\bar{\mathbf{v}}_{t-1}, \bar{\alpha}_{t-1}), \bar{\alpha}_t - \bar{\alpha}_{t-1} \rangle + \frac{\ell}{2} (\bar{\alpha}_t - \bar{\alpha}_{t-1})^2 \\ &\quad - \langle \partial_{\alpha} (f^s(\mathbf{v}, \bar{\alpha}_{t-1}) - f^s(\bar{\mathbf{v}}_{t-1}, \bar{\alpha}_{t-1})), \bar{\alpha}_t - \bar{\alpha}_{t-1} \rangle \\ &\stackrel{(a)}{\leq} -f^s(\mathbf{v}, \bar{\alpha}_{t-1}) - \langle \partial_{\alpha} f^s(\bar{\mathbf{v}}_{t-1}, \bar{\alpha}_{t-1}), \bar{\alpha}_t - \bar{\alpha}_{t-1} \rangle + \frac{\ell}{2} (\bar{\alpha}_t - \bar{\alpha}_{t-1})^2 \\ &\quad + \ell \|\mathbf{v} - \bar{\mathbf{v}}_{t-1}\| (\bar{\alpha}_t - \bar{\alpha}_{t-1}) \\ &\leq -f^s(\mathbf{v}, \bar{\alpha}_{t-1}) - \langle \partial_{\alpha} f^s(\bar{\mathbf{v}}_{t-1}, \bar{\alpha}_{t-1}), \bar{\alpha}_t - \bar{\alpha}_{t-1} \rangle + \frac{\ell}{2} (\bar{\alpha}_t - \bar{\alpha}_{t-1})^2 \\ &\quad + \frac{\ell}{6} \|\bar{\mathbf{v}}_{t-1} - \mathbf{v}\|^2 + \frac{3\ell}{2} (\bar{\alpha}_t - \bar{\alpha}_{t-1})^2 \end{aligned} \quad (15)$$

where (a) holds because that  $\partial_\alpha f^s(\mathbf{v}, \alpha)$  is  $\ell$ -Lipschitz in  $\mathbf{v}$ .

Adding (14), (15) and arranging terms, we have

$$\begin{aligned} -f^s(\bar{\mathbf{v}}_{t-1}, \bar{\alpha}_{t-1}) - f^s(\mathbf{v}, \bar{\alpha}_t) &\leq -f^s(\bar{\mathbf{v}}_{t-1}, \alpha) - f^s(\mathbf{v}, \bar{\alpha}_{t-1}) - \langle \partial_\alpha f^s(\bar{\mathbf{v}}_{t-1}, \bar{\alpha}_{t-1}), \bar{\alpha}_t - \alpha \rangle \\ &\quad + 2\ell(\bar{\alpha}_t - \bar{\alpha}_{t-1})^2 + \frac{\ell}{6} \|\bar{\mathbf{v}}_{t-1} - \mathbf{v}\|^2 - \frac{\mu_2}{2}(\alpha - \bar{\alpha}_{t-1})^2. \end{aligned} \quad (16)$$

Adding (13) and (16), we get

$$\begin{aligned} &f^s(\bar{\mathbf{v}}_t, \alpha) - f^s(\mathbf{v}, \bar{\alpha}_t) \\ &\leq \langle \partial_{\mathbf{v}} f(\bar{\mathbf{v}}_{t-1}, \bar{\alpha}_{t-1}), \bar{\mathbf{v}}_t - \mathbf{v} \rangle - \langle \partial_\alpha f(\bar{\mathbf{v}}_{t-1}, \bar{\alpha}_{t-1}), \bar{\alpha}_t - \alpha \rangle \\ &\quad + \frac{3\ell + 3\ell^2/\mu_2}{2} \|\bar{\mathbf{v}}_t - \bar{\mathbf{v}}_{t-1}\|^2 + 2\ell(\bar{\alpha}_t - \bar{\alpha}_{t-1})^2 \\ &\quad - \frac{\ell}{3} \|\bar{\mathbf{v}}_{t-1} - \mathbf{v}\|^2 - \frac{\mu_2}{3}(\bar{\alpha}_{t-1} - \alpha)^2 \end{aligned} \quad (17)$$

Taking average over  $t = 1, \dots, T$ , we get

$$\begin{aligned} &f^s(\bar{\mathbf{v}}, \alpha) - f^s(\mathbf{v}, \bar{\alpha}) \\ &\leq \frac{1}{T} \sum_{t=1}^T [f^s(\bar{\mathbf{v}}_t, \alpha) - f^s(\mathbf{v}, \bar{\alpha}_t)] \\ &\leq \frac{1}{T} \sum_{t=1}^T \left[ \underbrace{\langle \partial_{\mathbf{v}} f^s(\bar{\mathbf{v}}_{t-1}, \bar{\alpha}_{t-1}), \bar{\mathbf{v}}_t - \mathbf{v} \rangle}_{B_1} + \underbrace{\langle \partial_\alpha f^s(\bar{\mathbf{v}}_{t-1}, \bar{\alpha}_{t-1}), \alpha - \bar{\alpha}_t \rangle}_{B_2} \right. \\ &\quad \left. + \underbrace{\frac{3\ell + 3\ell^2/\mu_2}{2} \|\bar{\mathbf{v}}_t - \bar{\mathbf{v}}_{t-1}\|^2 + 2\ell(\bar{\alpha}_t - \bar{\alpha}_{t-1})^2}_{B_3} \right. \\ &\quad \left. - \frac{\ell}{3} \|\mathbf{v} - \bar{\mathbf{v}}_t\|^2 - \frac{\mu_2}{3}(\bar{\alpha}_{t-1} - \alpha)^2 \right] \end{aligned}$$

□

In the following, we will bound the term  $B_1$  by Lemma 6,  $B_2$  by Lemma 7 and  $B_3$  by Lemma 8.

**Lemma 6.** Define  $\hat{\mathbf{v}}_t = \bar{\mathbf{v}}_{t-1} - \frac{\eta}{K} \sum_{k=1}^K \nabla_{\mathbf{v}} f^s(\mathbf{v}_{t-1}^k, \alpha_{t-1}^k)$  and

$$\tilde{\mathbf{v}}_t = \tilde{\mathbf{v}}_{t-1} - \frac{\eta}{K} \sum_{k=1}^K (\nabla_{\mathbf{v}} F_k^s(\mathbf{v}_{t-1}^k, y_{t-1}^k; z_{t-1}^k) - \nabla_{\mathbf{v}} f_k^s(\mathbf{v}_{t-1}^k, \alpha_{t-1}^k)), \text{ for } t > 0; \tilde{\mathbf{v}}_0 = \mathbf{v}_0. \quad (18)$$

. We have

$$\begin{aligned} B_1 &\leq \frac{3\ell}{2} \frac{1}{K} \sum_{k=1}^K (\bar{\alpha}_{t-1} - \alpha_{t-1}^k)^2 + \frac{3\ell}{2} \frac{1}{K} \sum_{k=1}^K \|\bar{\mathbf{v}}_{t-1} - \mathbf{v}_{t-1}^k\|^2 \\ &\quad + \frac{3\eta}{2} \left\| \frac{1}{K} \sum_{k=1}^K [\nabla_{\mathbf{v}} f_k(\mathbf{v}_{t-1}^k, \alpha_{t-1}^k) - \nabla_{\mathbf{v}} F_k(\mathbf{v}_{t-1}^k, \alpha_{t-1}^k; z_{t-1}^k)] \right\|^2 \\ &\quad + \left\langle \frac{1}{K} \sum_{k=1}^K [\nabla_{\mathbf{v}} f_k(\mathbf{v}_{t-1}^k, \alpha_{t-1}^k) - \nabla_{\mathbf{v}} F_k(\mathbf{v}_{t-1}^k, \alpha_{t-1}^k; z_{t-1}^k)], \hat{\mathbf{v}}_t - \tilde{\mathbf{v}}_{t-1} \right\rangle \\ &\quad + \frac{1}{2\eta} (\|\bar{\mathbf{v}}_{t-1} - \mathbf{v}\|^2 - \|\bar{\mathbf{v}}_{t-1} - \tilde{\mathbf{v}}_t\|^2 - \|\tilde{\mathbf{v}}_t - \mathbf{v}\|^2) \\ &\quad + \frac{\ell}{3} \|\tilde{\mathbf{v}}_t - \mathbf{v}\|^2 + \frac{1}{2\eta} (\|\mathbf{v} - \tilde{\mathbf{v}}_{t-1}\|^2 - \|\mathbf{v} - \tilde{\mathbf{v}}_t\|^2) \end{aligned}$$

*Proof.* We have

$$\begin{aligned}
 \langle \nabla_{\mathbf{v}} f^s(\bar{\mathbf{v}}_{t-1}, \bar{\alpha}_{t-1}), \bar{\mathbf{v}}_t - \mathbf{v} \rangle &= \left\langle \frac{1}{K} \sum_{k=1}^K \nabla_{\mathbf{v}} f_k^s(\bar{\mathbf{v}}_{t-1}, \bar{\alpha}_{t-1}), \bar{\mathbf{v}}_t - \mathbf{v} \right\rangle \\
 &\leq \left\langle \frac{1}{K} \sum_{k=1}^K [\nabla_{\mathbf{v}} f_k^s(\bar{\mathbf{v}}_{t-1}, \bar{\alpha}_{t-1}) - \nabla_{\mathbf{v}} f_k^s(\bar{\mathbf{v}}_{t-1}, \alpha_{t-1}^k)], \bar{\mathbf{v}}_t - \mathbf{v} \right\rangle & \textcircled{1} \\
 &\quad + \left\langle \frac{1}{K} \sum_{k=1}^K [\nabla_{\mathbf{v}} f_k^s(\bar{\mathbf{v}}_{t-1}, \alpha_{t-1}^k) - \nabla_{\mathbf{v}} f_k^s(\mathbf{v}_{t-1}^k, \alpha_{t-1}^k)], \bar{\mathbf{v}}_t - \mathbf{v} \right\rangle & \textcircled{2} \\
 &\quad + \left\langle \frac{1}{K} \sum_{k=1}^K [\nabla_{\mathbf{v}} f_k^s(\mathbf{v}_{t-1}^k, \alpha_{t-1}^k) - \nabla_{\mathbf{v}} F_k^s(\bar{\mathbf{v}}_{t-1}, \alpha_{t-1}^k; z_{t-1}^k)], \bar{\mathbf{v}}_t - \mathbf{v} \right\rangle & \textcircled{3} \\
 &\quad + \left\langle \frac{1}{K} \sum_{k=1}^K \nabla_{\mathbf{v}} F_k^s(\bar{\mathbf{v}}_{t-1}, \alpha_{t-1}^k; z_{t-1}^k), \bar{\mathbf{v}}_t - \mathbf{v} \right\rangle & \textcircled{4}
 \end{aligned} \tag{19}$$

Then we will bound ①, ②, ③ and ④, respectively,

$$\begin{aligned}
 \textcircled{1} &\stackrel{(a)}{\leq} \frac{3}{2\ell} \left\| \frac{1}{K} \sum_{k=1}^K [\nabla_{\mathbf{v}} f_k^s(\bar{\mathbf{v}}_{t-1}, \bar{\alpha}_{t-1}) - \nabla_{\mathbf{v}} f_k^s(\bar{\mathbf{v}}_{t-1}, \alpha_{t-1}^k)] \right\|^2 + \frac{\ell}{6} \|\bar{\mathbf{v}}_t - \mathbf{v}\|^2 \\
 &\stackrel{(b)}{\leq} \frac{3}{2\ell} \frac{1}{K} \sum_{k=1}^K \|\nabla_{\mathbf{v}} f_k^s(\bar{\mathbf{v}}_{t-1}, \bar{\alpha}_{t-1}) - \nabla_{\mathbf{v}} f_k^s(\bar{\mathbf{v}}_{t-1}, \alpha_{t-1}^k)\|^2 + \frac{\ell}{6} \|\bar{\mathbf{v}}_t - \mathbf{v}\|^2 & \textcircled{20} \\
 &\stackrel{(c)}{\leq} \frac{3\ell}{2} \frac{1}{K} \sum_{k=1}^K (\bar{\alpha}_{t-1} - \alpha_{t-1}^k)^2 + \frac{\ell}{6} \|\bar{\mathbf{v}}_t - \mathbf{v}\|^2,
 \end{aligned}$$

where (a) follows from Young's inequality, (b) follows from Jensen's inequality. and (c) holds because  $\nabla_{\mathbf{v}} f_k^s(\mathbf{v}, \alpha)$  is  $\ell$ -Lipschitz in  $\alpha$ . Using similar techniques, we have

$$\begin{aligned}
 \textcircled{2} &\leq \frac{3}{2\ell} \frac{1}{K} \sum_{k=1}^K \|\nabla_{\mathbf{v}} f_k^s(\bar{\mathbf{v}}_{t-1}, \alpha_{t-1}^k) - \nabla_{\mathbf{v}} f_k^s(\mathbf{v}_{t-1}^k, \alpha_{t-1}^k)\|^2 + \frac{\ell}{6} \|\bar{\mathbf{v}}_t - \mathbf{v}\|^2 \\
 &\leq \frac{3\ell}{2} \frac{1}{K} \sum_{k=1}^K \|\bar{\mathbf{v}}_{t-1} - \mathbf{v}_{t-1}^k\|^2 + \frac{\ell}{6} \|\bar{\mathbf{v}}_t - \mathbf{v}\|^2.
 \end{aligned} \tag{21}$$

Let  $\hat{\mathbf{v}}_t = \arg \min_{\mathbf{v}} \left( \frac{1}{K} \sum_{k=1}^K \nabla_{\mathbf{v}} f^s(\mathbf{v}_{t-1}^k, \alpha_{t-1}^k) \right)^\top x + \frac{1}{2\eta} \|\mathbf{v} - \bar{\mathbf{v}}_{t-1}\|^2$ , then we have

$$\bar{\mathbf{v}}_t - \hat{\mathbf{v}}_t = \eta \left( \nabla_{\mathbf{v}} f^s(\mathbf{v}_{t-1}^k, y_{t-1}^k) - \frac{1}{K} \sum_{k=1}^K \nabla_{\mathbf{v}} f_k^s(\mathbf{v}_{t-1}^k, y_{t-1}^k; z_{t-1}^k) \right) \tag{22}$$

Hence we get

$$\begin{aligned}
 \textcircled{3} &= \left\langle \frac{1}{K} \sum_{k=1}^K [\nabla_{\mathbf{v}} f_k^s(\mathbf{v}_{t-1}^k, \alpha_{t-1}^k) - \nabla_{\mathbf{v}} F_k^s(\mathbf{v}_{t-1}^k, \alpha_{t-1}^k; z_{t-1}^k)], \tilde{\mathbf{v}}_t - \hat{\mathbf{v}}_t \right\rangle \\
 &\quad + \left\langle \frac{1}{K} \sum_{k=1}^K [\nabla_{\mathbf{v}} f_k^s(\mathbf{v}_{t-1}^k, \alpha_{t-1}^k) - \nabla_{\mathbf{v}} F_k^s(\mathbf{v}_{t-1}^k, \alpha_{t-1}^k; z_{t-1}^k)], \hat{\mathbf{v}}_t - \mathbf{v} \right\rangle \\
 &= \eta \left\| \frac{1}{K} \sum_{k=1}^K [\nabla_{\mathbf{v}} f_k^s(\mathbf{v}_{t-1}^k, \alpha_{t-1}^k) - \nabla_{\mathbf{v}} F_k^s(\mathbf{v}_{t-1}^k, \alpha_{t-1}^k; z_{t-1}^k)] \right\|^2 \\
 &\quad + \left\langle \frac{1}{K} \sum_{k=1}^K [\nabla_{\mathbf{v}} f_k^s(\mathbf{v}_{t-1}^k, \alpha_{t-1}^k) - \nabla_{\mathbf{v}} F_k^s(\mathbf{v}_{t-1}^k, \alpha_{t-1}^k; z_{t-1}^k)], \hat{\mathbf{v}}_t - \mathbf{v} \right\rangle
 \end{aligned} \tag{23}$$

Define another auxiliary sequence as

$$\tilde{\mathbf{v}}_t = \tilde{\mathbf{v}}_{t-1} - \frac{\eta}{K} \sum_{k=1}^K (\nabla_{\mathbf{v}} F_k^s(\mathbf{v}_{t-1}^k, y_{t-1}^k; z_{t-1}^k) - \nabla_{\mathbf{v}} f_k^s(\mathbf{v}_{t-1}^k, \alpha_{t-1}^k)), \text{ for } t > 0; \tilde{\mathbf{v}}_0 = \mathbf{v}_0. \tag{24}$$

Denote

$$\Theta_{t-1}(\mathbf{v}) = \left( -\frac{1}{K} \sum_{k=1}^K (\nabla_{\mathbf{v}} F_k^s(\mathbf{v}_{t-1}^k, y_{t-1}^k; z_{t-1}^k) - \nabla_{\mathbf{v}} f_k^s(\mathbf{v}_{t-1}^k, \alpha_{t-1}^k)) \right)^\top x + \frac{1}{2\eta} \|\mathbf{v} - \tilde{\mathbf{v}}_{t-1}\|^2. \tag{25}$$

Hence, for the auxiliary sequence  $\tilde{\alpha}_t$ , we can verify that

$$\tilde{\mathbf{v}}_t = \arg \min_{\mathbf{v}} \Theta_{t-1}(\mathbf{v}). \tag{26}$$

Since  $\Theta_{t-1}(\mathbf{v})$  is  $\frac{1}{\eta}$ -strongly convex, we have

$$\begin{aligned}
 &\frac{1}{2} \|\mathbf{v} - \tilde{\mathbf{v}}_t\|^2 \leq \Theta_{t-1}(\mathbf{v}) - \Theta_{t-1}(\tilde{\mathbf{v}}_t) \\
 &= \left( -\frac{1}{K} \sum_{k=1}^K (\nabla_{\mathbf{v}} F_k^s(\mathbf{v}_{t-1}^k, \alpha_{t-1}^k; z_{t-1}^k) - \nabla_{\mathbf{v}} f_k^s(\mathbf{v}_{t-1}^k, \alpha_{t-1}^k)) \right)^\top x + \frac{1}{2\eta} \|\mathbf{v} - \tilde{\mathbf{v}}_{t-1}\|^2 \\
 &\quad - \left( -\frac{1}{K} \sum_{k=1}^K (\nabla_{\mathbf{v}} F_k^s(\mathbf{v}_{t-1}^k, \alpha_{t-1}^k; z_{t-1}^k) - \nabla_{\mathbf{v}} f_k^s(\mathbf{v}_{t-1}^k, \alpha_{t-1}^k)) \right)^\top \tilde{\mathbf{v}}_t - \frac{1}{2\eta} \|\tilde{\mathbf{v}}_t - \tilde{\mathbf{v}}_{t-1}\|^2 \\
 &= \left( -\frac{1}{K} \sum_{k=1}^K (\nabla_{\alpha} F_k^s(\mathbf{v}_{t-1}^k, \alpha_{t-1}^k; z_{t-1}^k) - \nabla_{\alpha} f_k^s(\mathbf{v}_{t-1}^k, \alpha_{t-1}^k)) \right)^\top (\mathbf{v} - \tilde{\mathbf{v}}_{t-1}) + \frac{1}{2\eta} \|\mathbf{v} - \tilde{\mathbf{v}}_{t-1}\|^2 \\
 &\quad - \left( -\frac{1}{K} \sum_{k=1}^K (\nabla_{\alpha} F_k^s(\mathbf{v}_{t-1}^k, \alpha_{t-1}^k; z_{t-1}^k) - \nabla_{\alpha} f_k^s(\mathbf{v}_{t-1}^k, \alpha_{t-1}^k)) \right)^\top (\tilde{\mathbf{v}}_t - \tilde{\mathbf{v}}_{t-1}) - \frac{1}{2\eta} \|\tilde{\mathbf{v}}_t - \tilde{\mathbf{v}}_{t-1}\|^2 \\
 &\leq \left( -\frac{1}{K} \sum_{k=1}^K (\nabla_{\mathbf{v}} F_k^s(\mathbf{v}_{t-1}^k, \alpha_{t-1}^k; z_{t-1}^k) - \nabla_{\mathbf{v}} f_k^s(\mathbf{v}_{t-1}^k, \alpha_{t-1}^k)) \right)^\top (\mathbf{v} - \tilde{\mathbf{v}}_{t-1}) + \frac{1}{2\eta} \|\mathbf{v} - \tilde{\mathbf{v}}_{t-1}\|^2 \\
 &\quad + \frac{\eta}{2} \left\| \frac{1}{K} \sum_{k=1}^K (\nabla_{\mathbf{v}} F_k^s(\mathbf{v}_{t-1}^k, \alpha_{t-1}^k; z_{t-1}^k) - \nabla_{\mathbf{v}} f_k^s(\mathbf{v}_{t-1}^k, \alpha_{t-1}^k)) \right\|^2
 \end{aligned} \tag{27}$$

Adding this with (23), we get

$$\begin{aligned}
 \textcircled{3} &\leq \frac{3\eta}{2} \left\| \frac{1}{K} \sum_{k=1}^K (\nabla_{\mathbf{v}} F_k^s(\mathbf{v}_{t-1}^k, \alpha_{t-1}^k; z_{t-1}^k) - \nabla_{\mathbf{v}} f_k^s(\mathbf{v}_{t-1}^k, \alpha_{t-1}^k)) \right\|^2 + \frac{1}{2\eta} \|\mathbf{v} - \tilde{\mathbf{v}}_{t-1}\|^2 - \frac{1}{2} \|\mathbf{v} - \tilde{\mathbf{v}}_t\|^2 \\
 &\quad + \left\langle \frac{1}{K} \sum_{k=1}^K [\nabla_{\mathbf{v}} f_k^s(\mathbf{v}_{t-1}^k, \alpha_{t-1}^k) - \nabla_{\mathbf{v}} F_k^s(\mathbf{v}_{t-1}^k, \alpha_{t-1}^k; z_{t-1}^k)], \hat{\mathbf{v}}_t - \tilde{\mathbf{v}}_{t-1} \right\rangle
 \end{aligned} \tag{28}$$

④ can be bounded as

$$\textcircled{4} = -\frac{1}{\eta} \langle \bar{\mathbf{v}}_t - \bar{\mathbf{v}}_{t-1}, \bar{\mathbf{v}}_t - \mathbf{v} \rangle = \frac{1}{2\eta} (\|\bar{\mathbf{v}}_{t-1} - \mathbf{v}\|^2 - \|\bar{\mathbf{v}}_{t-1} - \bar{\mathbf{v}}_t\|^2 - \|\bar{\mathbf{v}}_t - \mathbf{v}\|^2) \quad (29)$$

Plug (20), (21), (28) and (29) into (19), we get

$$\begin{aligned} & \langle \nabla_{\mathbf{v}} f(\bar{\mathbf{v}}_{t-1}, \bar{\alpha}_{t-1}), \bar{\mathbf{v}}_t - x \rangle \\ & \leq \frac{3\ell}{2} \frac{1}{K} \sum_{k=1}^K (\bar{\alpha}_{t-1} - \alpha_{t-1}^k)^2 + \frac{3\ell}{2} \frac{1}{K} \sum_{k=1}^K \|\bar{\mathbf{v}}_{t-1} - \mathbf{v}_{t-1}^k\|^2 \\ & \quad + \frac{3\eta}{2} \left\| \frac{1}{K} \sum_{k=1}^K [\nabla_{\mathbf{v}} f_k(\mathbf{v}_{t-1}^k, \alpha_{t-1}^k) - \nabla_{\mathbf{v}} F_k(\mathbf{v}_{t-1}^k, \alpha_{t-1}^k; z_{t-1}^k)] \right\|^2 \\ & \quad + \left\langle \frac{1}{K} \sum_{k=1}^K [\nabla_{\mathbf{v}} f_k(\mathbf{v}_{t-1}^k, \alpha_{t-1}^k) - \nabla_{\mathbf{v}} F_k(\mathbf{v}_{t-1}^k, \alpha_{t-1}^k; z_{t-1}^k)], \hat{\mathbf{v}}_t - \tilde{\mathbf{v}}_{t-1} \right\rangle \\ & \quad + \frac{1}{2\eta} (\|\bar{\mathbf{v}}_{t-1} - \mathbf{v}\|^2 - \|\bar{\mathbf{v}}_{t-1} - \bar{\mathbf{v}}_t\|^2 - \|\bar{\mathbf{v}}_t - \mathbf{v}\|^2) \\ & \quad + \frac{\ell}{3} \|\bar{\mathbf{v}}_t - \mathbf{v}\|^2 + \frac{1}{2\eta} (\|\mathbf{v} - \tilde{\mathbf{v}}_{t-1}\|^2 - \|\mathbf{v} - \bar{\mathbf{v}}_t\|^2) \end{aligned}$$

□

$B_2$  can be bounded by the following lemma, whose proof is identical to that of Lemma 5 in (Guo et al., 2020a).

**Lemma 7.** Define  $\hat{\alpha}_t = \bar{\alpha}_{t-1} + \frac{\eta}{K} \sum_{k=1}^K \nabla_{\alpha} f_k(\mathbf{v}_{t-1}^k, \alpha_{t-1}^k)$ , and

$$\tilde{\alpha}_t = \tilde{\alpha}_{t-1} + \frac{\eta}{K} \sum_{k=1}^K (\nabla_{\alpha} F_k(\mathbf{v}_{t-1}^k, \alpha_{t-1}^k; z_{t-1}^k) - \nabla_{\alpha} f_k(\mathbf{v}_{t-1}^k, \alpha_{t-1}^k)).$$

We have,

$$\begin{aligned} B_2 & \leq \frac{3\ell^2}{2\mu_2} \frac{1}{K} \sum_{k=1}^K \|\bar{\mathbf{v}}_{t-1} - \mathbf{v}_{t-1}^k\|^2 + \frac{3\ell^2}{2\mu_2} \frac{1}{K} \sum_{k=1}^K (\bar{\alpha}_{t-1} - \alpha_{t-1}^k)^2 \\ & \quad + \frac{3\eta}{2} \left( \frac{1}{K} \sum_{k=1}^K [\nabla_{\alpha} f_k(\mathbf{v}_{t-1}^k, \alpha_{t-1}^k) - \nabla_{\alpha} F_k(\mathbf{v}_{t-1}^k, \alpha_{t-1}^k; z_{t-1}^k)] \right)^2 \\ & \quad + \frac{1}{K} \sum_{k=1}^K \langle \nabla_{\alpha} f_k(\mathbf{v}_{t-1}^k, \alpha_{t-1}^k) - \nabla_{\alpha} F_k(\mathbf{v}_{t-1}^k, \alpha_{t-1}^k; z_{t-1}^k), \tilde{\alpha}_{t-1} - \hat{\alpha}_t \rangle \\ & \quad + \frac{1}{2\eta} ((\bar{\alpha}_{t-1} - \alpha)^2 - (\bar{\alpha}_{t-1} - \bar{\alpha}_t)^2 - (\bar{\alpha}_t - \alpha)^2) \\ & \quad + \frac{\mu_2}{3} (\bar{\alpha}_t - \alpha)^2 + \frac{1}{2\eta} (\alpha - \tilde{\alpha}_{t-1})^2 - \frac{1}{2\eta} (\alpha - \bar{\alpha}_t)^2. \end{aligned}$$

□

$B_3$  can be bounded by the following lemma.

**Lemma 8.** If  $K$  machines communicate every  $I$  iterations, where  $I \leq \frac{1}{18\sqrt{2\eta\ell}}$ , then

$$\sum_{t=0}^{T-1} \frac{1}{K} \sum_{k=1}^K \mathbb{E} \left[ \|\bar{\mathbf{v}}_t - \mathbf{v}_t^k\|^2 + \|\bar{\alpha}_t - \alpha_t^k\|^2 \right] \leq (12\eta^2 I \sigma^2 T + 36\eta^2 I^2 D^2 T) \mathbb{I}_{I>1}$$

*Proof.* In this proof, we introduce a couple of new notations to make the proof brief:  $F_{k,t}^s = F_{k,t}^s(\mathbf{v}_t^k, \alpha_t^k; z_t^k)$  and  $f_{k,t}^s = f_{k,t}^s(\mathbf{v}_t^k, \alpha_t^k)$ . Similar bounds for minimization problems have been analyzed in (Yu et al., 2019a; Stich, 2019).

Denote  $t_0$  as the nearest communication round before  $t$ , i.e.,  $t - t_0 \leq I$ . By the update rule of  $\mathbf{v}$ , we have that on each machine  $k$ ,

$$\mathbf{v}_t^k = \bar{\mathbf{v}}_{t_0} - \eta \sum_{\tau=t_0}^{t-1} \nabla_{\mathbf{v}} F_{k,\tau}^s. \quad (30)$$

Taking average over all  $K$  machines,

$$\bar{\mathbf{v}}_t = \bar{\mathbf{v}}_{t_0} - \eta \sum_{\tau=t_0}^{t-1} \frac{1}{K} \sum_{k=1}^K \nabla_{\mathbf{v}} F_{k,\tau}^s. \quad (31)$$

Therefore,

$$\begin{aligned} \frac{1}{K} \sum_{k=1}^K \|\bar{\mathbf{v}}_t - \mathbf{v}_t^k\|^2 &= \frac{\eta^2}{K} \sum_{k=1}^K \mathbb{E} \left[ \left\| \sum_{\tau=t_0}^{t-1} \left[ \nabla_{\mathbf{v}} F_{k,\tau}^s - \frac{1}{K} \sum_{j=1}^K \nabla_{\mathbf{v}} F_{j,\tau}^s \right] \right\|^2 \right] \\ &\leq \frac{2\eta^2}{K} \sum_{k=1}^K \mathbb{E} \left[ \left\| \sum_{\tau=t_0}^{t-1} \left[ \nabla_{\mathbf{v}} F_{k,\tau}^s - \nabla_{\mathbf{v}} f_{k,\tau}^s \right] - \frac{1}{K} \sum_{j=1}^K \left[ \nabla_{\mathbf{v}} F_{j,\tau}^s - \nabla_{\mathbf{v}} f_{j,\tau}^s \right] \right\|^2 \right] \\ &\quad + \frac{2\eta^2}{K} \sum_{k=1}^K \mathbb{E} \left[ \left\| \sum_{\tau=t_0}^{t-1} \left[ \nabla_{\mathbf{v}} f_{k,\tau}^s - \frac{1}{K} \sum_{j=1}^K \nabla_{\mathbf{v}} f_{j,\tau}^s \right] \right\|^2 \right] \end{aligned} \quad (32)$$

In the following, we will address these two terms on the right hand side separately. First, we have

$$\begin{aligned} &\frac{2\eta^2}{K} \sum_{k=1}^K \mathbb{E} \left[ \left\| \sum_{\tau=t_0}^{t-1} \left[ \nabla_{\mathbf{v}} F_{k,\tau}^s - \nabla_{\mathbf{v}} f_{k,\tau}^s \right] - \frac{1}{K} \sum_{j=1}^K \left[ \nabla_{\mathbf{v}} F_{j,\tau}^s - \nabla_{\mathbf{v}} f_{j,\tau}^s \right] \right\|^2 \right] \\ &\stackrel{(a)}{\leq} \frac{2\eta^2}{K} \sum_{k=1}^K \mathbb{E} \left[ \left\| \sum_{\tau=t_0}^{t-1} \left[ \nabla_{\mathbf{v}} F_{k,\tau}^s - \nabla_{\mathbf{v}} f_{k,\tau}^s \right] \right\|^2 \right] \\ &\stackrel{(b)}{\leq} \frac{2\eta^2}{K} \sum_{k=1}^K \sum_{\tau=t_0}^{t-1} \mathbb{E} \left[ \left\| \nabla_{\mathbf{v}} F_{k,\tau}^s - \nabla_{\mathbf{v}} f_{k,\tau}^s \right\|^2 \right] \\ &\leq 2\eta^2 I \sigma^2, \end{aligned} \quad (33)$$

where (a) holds by  $\frac{1}{K} \sum_{k=1}^K \|a_k - \frac{1}{K} \sum_{j=1}^K a_j\|^2 = \frac{1}{K} \sum_{k=1}^K \|a_k\|^2 - \frac{1}{K} \sum_{k=1}^K a_k \cdot \frac{1}{K} \sum_{k=1}^K a_k \leq \frac{1}{K} \sum_{k=1}^K \|a_k\|^2$ , where  $a_k = \sum_{\tau=t_0}^{t-1} [\nabla_{\mathbf{v}} F_{k,\tau}^s - \nabla_{\mathbf{v}} f_{k,\tau}^s]$ ; (b) follows because  $\mathbb{E}_{k,\tau-1} [\nabla_{\mathbf{v}} F_{k,\tau}^s - \nabla_{\mathbf{v}} f_{k,\tau}^s] = 0$ .

Second, we have

$$\begin{aligned} &\frac{1}{K} \sum_{k=1}^K \mathbb{E} \left[ \left\| \sum_{\tau=t_0}^{t-1} \left[ \nabla_{\mathbf{v}} f_{k,\tau}^s - \frac{1}{K} \sum_{j=1}^K \nabla_{\mathbf{v}} f_{j,\tau}^s \right] \right\|^2 \right] \\ &\leq \frac{1}{K} \sum_{k=1}^K (t - t_0) \sum_{\tau=t_0}^{t-1} \mathbb{E} \left[ \left\| \nabla_{\mathbf{v}} f_{k,\tau}^s - \frac{1}{K} \sum_{j=1}^K \nabla_{\mathbf{v}} f_{j,\tau}^s \right\|^2 \right] \\ &\leq I \sum_{\tau=t_0}^{t-1} \frac{1}{K} \sum_{k=1}^K \mathbb{E} \left[ \left\| \nabla_{\mathbf{v}} f_{k,\tau}^s - \frac{1}{K} \sum_{j=1}^K \nabla_{\mathbf{v}} f_{j,\tau}^s \right\|^2 \right], \end{aligned} \quad (34)$$

where

$$\begin{aligned}
 & \frac{1}{K} \sum_{k=1}^K \mathbb{E} \left\| \nabla_{\mathbf{v}} f_{k,\tau}^s - \frac{1}{K} \sum_{j=1}^K \nabla_{\mathbf{v}} f_{j,\tau}^s \right\|^2 \\
 &= \frac{1}{K} \sum_{k=1}^K \mathbb{E} \left\| \nabla_{\mathbf{v}} f_{k,\tau}^s - \nabla_{\mathbf{v}} f_k^s(\bar{\mathbf{v}}_\tau, \bar{\alpha}_\tau) + \nabla_{\mathbf{v}} f_k^s(\bar{\mathbf{v}}_\tau, \bar{\alpha}_\tau) - \nabla_{\mathbf{v}} f^s(\bar{\mathbf{v}}_\tau, \bar{\alpha}_\tau) + \nabla_{\mathbf{v}} f^s(\bar{\mathbf{v}}_\tau, \bar{\alpha}_\tau) - \frac{1}{K} \sum_{j=1}^K \nabla_{\mathbf{v}} f_{j,\tau}^s \right\|^2 \\
 &\leq \frac{1}{K} \sum_{k=1}^K \left[ 3\mathbb{E} \|\nabla_{\mathbf{v}} f_{k,\tau}^s - \nabla_{\mathbf{v}} f_k^s(\bar{\mathbf{v}}_\tau, \bar{\alpha}_\tau)\|^2 + 3\mathbb{E} \|\nabla_{\mathbf{v}} f_k^s(\bar{\mathbf{v}}_\tau, \bar{\alpha}_\tau) - \nabla_{\mathbf{v}} f^s(\bar{\mathbf{v}}_\tau, \bar{\alpha}_\tau)\|^2 \right] \\
 &\quad + 3\mathbb{E} \left\| \nabla_{\mathbf{v}} f^s(\bar{\mathbf{v}}_\tau, \bar{\alpha}_\tau) - \frac{1}{K} \sum_{j=1}^K \nabla_{\mathbf{v}} f_{j,\tau}^s \right\|^2 \\
 &= \frac{1}{K} \sum_{k=1}^K \left[ 3\mathbb{E} \|\nabla_{\mathbf{v}} f_{k,\tau}^s - \nabla_{\mathbf{v}} f_k^s(\bar{\mathbf{v}}_\tau, \bar{\alpha}_\tau)\|^2 + 3\mathbb{E} \|\nabla_{\mathbf{v}} f_k^s(\bar{\mathbf{v}}_\tau, \bar{\alpha}_\tau) - \nabla_{\mathbf{v}} f^s(\bar{\mathbf{v}}_\tau, \bar{\alpha}_\tau)\|^2 \right] \\
 &\quad + 3\mathbb{E} \left\| \frac{1}{K} \sum_{j=1}^K [\nabla_{\mathbf{v}} f_j^s(\bar{\mathbf{v}}_\tau, \bar{\alpha}_\tau) - \nabla_{\mathbf{v}} f_{j,\tau}^s] \right\|^2 \\
 &\leq \frac{1}{K} \sum_{k=1}^K \left[ 3\mathbb{E} \|\nabla_{\mathbf{v}} f_{k,\tau}^s - \nabla_{\mathbf{v}} f_k^s(\bar{\mathbf{v}}_\tau, \bar{\alpha}_\tau)\|^2 + 3\mathbb{E} \|\nabla_{\mathbf{v}} f_k^s(\bar{\mathbf{v}}_\tau, \bar{\alpha}_\tau) - \nabla_{\mathbf{v}} f^s(\bar{\mathbf{v}}_\tau, \bar{\alpha}_\tau)\|^2 \right] \\
 &\quad + 3\frac{1}{K} \sum_{j=1}^K \mathbb{E} \left\| [\nabla_{\mathbf{v}} f_j^s(\bar{\mathbf{v}}_\tau, \bar{\alpha}_\tau) - \nabla_{\mathbf{v}} f_{j,\tau}^s] \right\|^2 \\
 &\stackrel{(a)}{\leq} \frac{54\ell^2}{K} \sum_{k=1}^K [\|\mathbf{v}_{k,\tau} - \bar{\mathbf{v}}_\tau\|^2 + |\alpha_{k,\tau} - \bar{\alpha}_\tau|^2] + \frac{3}{K} \sum_{k=1}^K \|\nabla_{\mathbf{v}} f_k^s(\bar{\mathbf{v}}_\tau, \bar{\alpha}_\tau) - \nabla_{\mathbf{v}} f^s(\bar{\mathbf{v}}_\tau, \bar{\alpha}_\tau)\|^2 \\
 &\leq \frac{54\ell^2}{K} \sum_{k=1}^K [\|\mathbf{v}_{k,\tau} - \bar{\mathbf{v}}_\tau\|^2 + |\alpha_{k,\tau} - \bar{\alpha}_\tau|^2] + 3D^2,
 \end{aligned} \tag{35}$$

where (a) holds because  $f$  is  $\ell$ -smooth, i.e.,  $f^s$  is  $3\ell$ -smooth.

Combining (32), (33), (34) and (35),

$$\frac{1}{K} \sum_{k=1}^K \|\bar{\mathbf{v}}_t - \mathbf{v}_t^k\|^2 \leq 2\eta^2 I \sigma^2 + 2\eta^2 \left( I \sum_{\tau=t_0}^{t-1} \left[ \frac{54\ell^2}{K} \sum_{k=1}^K [\|\mathbf{v}_\tau^k - \bar{\mathbf{v}}_\tau\|^2 + \|\alpha_{k,\tau} - \bar{\alpha}_\tau\|^2] + 3D^2 \right] \right) \tag{36}$$

Summing over  $t = \{0, \dots, T-1\}$ ,

$$\sum_{t=0}^{T-1} \frac{1}{K} \sum_{k=1}^K \|\bar{\mathbf{v}}_t - \mathbf{v}_t^k\|^2 \leq 2\eta^2 I \sigma^2 T + 108\eta^2 I^2 \ell^2 \sum_{t=0}^{T-1} \frac{1}{K} \left( \|\mathbf{v}_t^k - \bar{\mathbf{v}}_t\|^2 + \|\alpha_t^k - \bar{\alpha}_t\|^2 \right) + 6\eta^2 I^2 D^2 T. \tag{37}$$

Similarly for  $\alpha$  side, we have

$$\sum_{t=0}^{T-1} \frac{1}{K} \sum_{k=1}^K \|\bar{\alpha}_t - \alpha_t^k\|^2 \leq 2\eta^2 I \sigma^2 T + 108\eta^2 I^2 \ell^2 \sum_{t=0}^{T-1} \frac{1}{K} \left( \|\mathbf{v}_t^k - \bar{\mathbf{v}}_t\|^2 + \|\alpha_t^k - \bar{\alpha}_t\|^2 \right) + 6\eta^2 I^2 D^2 T. \tag{38}$$

Summing up the above two inequalities,

$$\begin{aligned}
 \sum_{t=0}^{T-1} \frac{1}{K} \sum_{k=1}^K [\|\bar{\mathbf{v}}_t - \mathbf{v}_t^k\|^2 + \mathbb{E}[\|\bar{\alpha}_t - \alpha_t^k\|^2]] &\leq \frac{4\eta^2 I \sigma^2}{1 - 216\eta^2 I^2 \ell^2} T + \frac{12\eta^2 I^2 D^2}{1 - 216\eta^2 I^2 \ell^2} T \\
 &\leq 12\eta^2 I \sigma^2 T + 36\eta^2 I^2 D^2 T
 \end{aligned} \tag{39}$$

where the second inequality is due to  $I \leq \frac{1}{18\sqrt{2}\eta\ell}$ , i.e.,  $1 - 216\eta^2 I^2 \ell^2 \geq \frac{2}{3}$ .  $\square$

Based on above lemmas, we are ready to give the convergence of duality gap in one stage of CODA+.



**B.2. Proof of Lemma 1**

*Proof.* Noting  $\mathbb{E}\langle \frac{1}{K} \sum_{k=1}^K [\nabla_{\mathbf{v}} f_k(\mathbf{v}_{t-1}^k, \alpha_{t-1}^k) - \nabla_{\mathbf{v}} F_k(\mathbf{v}_{t-1}^k, \alpha_{t-1}^k; z_{t-1}^k)], \hat{\mathbf{v}}_t - \tilde{\mathbf{v}}_{t-1} \rangle = 0$  and

$\mathbb{E}\left\langle -\frac{1}{K} \sum_{k=1}^K [\nabla_{\alpha} f_k(\mathbf{v}_{t-1}^k, \alpha_{t-1}^k) - F_k(\mathbf{v}_{t-1}^k, \alpha_{t-1}^k; z_{t-1}^k)], \tilde{\alpha}_{t-1} - \hat{\alpha}_t \right\rangle = 0$ . and then plugging Lemma 6 and Lemma 7 into Lemma 5, and taking expectation, we get

$$\begin{aligned}
 & \mathbb{E}[f^s(\bar{\mathbf{v}}, \alpha) - f^s(\mathbf{v}, \bar{\alpha})] \\
 & \leq \frac{1}{T} \sum_{t=1}^T \mathbb{E} \left[ \underbrace{\left( \frac{3\ell + 3\ell^2/\mu_2}{2} - \frac{1}{2\eta} \right) \|\tilde{\mathbf{v}}_{t-1} - \bar{\mathbf{v}}_t\|^2 + \left( 2\ell - \frac{1}{2\eta} \right) \|\bar{\alpha}_t - \bar{\alpha}_{t-1}\|^2}_{C_1} \right. \\
 & \quad + \underbrace{\left( \frac{1}{2\eta} - \frac{\mu_2}{3} \right) \|\bar{\alpha}_{t-1} - \alpha\|^2 - \left( \frac{1}{2\eta} - \frac{\mu_2}{3} \right) (\bar{\alpha}_t - \alpha)^2}_{C_2} + \underbrace{\left( \frac{1}{2\eta} - \frac{\ell}{3} \right) \|\tilde{\mathbf{v}}_{t-1} - \mathbf{v}\|^2 - \left( \frac{1}{2\eta} - \frac{\ell}{3} \right) \|\bar{\mathbf{v}}_t - \mathbf{v}\|^2}_{C_3} \\
 & \quad + \underbrace{\frac{1}{2\eta} ((\alpha - \bar{\alpha}_{t-1})^2 - (\alpha - \bar{\alpha}_t)^2)}_{C_4} + \underbrace{\frac{1}{2\eta} (\|\mathbf{v} - \tilde{\mathbf{v}}_{t-1}\|^2 - \|\mathbf{v} - \bar{\mathbf{v}}_t\|^2)}_{C_5} \\
 & \quad + \underbrace{\left( \frac{3\ell^2}{2\mu_2} + \frac{3\ell}{2} \right) \frac{1}{K} \sum_{k=1}^K \|\tilde{\mathbf{v}}_{t-1} - \mathbf{v}_{t-1}^k\|^2 + \left( \frac{3\ell}{2} + \frac{3\ell^2}{2\mu_2} \right) \frac{1}{K} \sum_{k=1}^K (\bar{\alpha}_{t-1} - \alpha_{t-1}^k)^2}_{C_6} \\
 & \quad + \underbrace{\frac{3\eta}{2} \left\| \frac{1}{K} \sum_{k=1}^K [\nabla_{\mathbf{v}} f_k(\mathbf{v}_{t-1}^k, \alpha_{t-1}^k) - \nabla_{\mathbf{v}} F_k^s(\mathbf{v}_{t-1}^k, \alpha_{t-1}^k; z_{t-1}^k)] \right\|^2}_{C_7} \\
 & \quad \left. + \underbrace{\frac{3\eta}{2} \left\| \frac{1}{K} \sum_{k=1}^K \nabla_{\alpha} f_k^s(\mathbf{v}_{t-1}^k, \alpha_{t-1}^k) - \nabla_{\alpha} F_k^s(\mathbf{v}_{t-1}^k, \alpha_{t-1}^k; z_{t-1}^k) \right\|^2}_{C_8} \right] \tag{40}
 \end{aligned}$$

Since  $\eta \leq \min(\frac{1}{3\ell + 3\ell^2/\mu_2}, \frac{1}{4\ell})$ , thus in the RHS of (40),  $C_1$  can be cancelled.  $C_2, C_3, C_4$  and  $C_5$  will be handled by telescoping sum.  $C_6$  can be bounded by Lemma 8.

Taking expectation over  $C_7$ ,

$$\begin{aligned}
 & \mathbb{E} \left[ \frac{3\eta}{2} \left\| \frac{1}{K} \sum_{k=1}^K [\nabla_{\mathbf{v}} f_k^s(\mathbf{v}_{t-1}^k, \alpha_{t-1}^k) - \nabla_{\mathbf{v}} F_k^s(\mathbf{v}_{t-1}^k, \alpha_{t-1}^k; z_{t-1}^k)] \right\|^2 \right] \\
 & = \mathbb{E} \left[ \frac{3\eta}{2K^2} \left\| \sum_{k=1}^K [\nabla_{\mathbf{v}} f_k^s(\mathbf{v}_{t-1}^k, \alpha_{t-1}^k) - \nabla_{\mathbf{v}} F_k^s(\mathbf{v}_{t-1}^k, \alpha_{t-1}^k; z_{t-1}^k)] \right\|^2 \right] \\
 & = \mathbb{E} \left[ \frac{3\eta}{2K^2} \left( \sum_{k=1}^K \|\nabla_{\mathbf{v}} f_k^s(\mathbf{v}_{t-1}^k, \alpha_{t-1}^k) - \nabla_{\mathbf{v}} F_k^s(\mathbf{v}_{t-1}^k, \alpha_{t-1}^k; z_{t-1}^k)\|^2 \right. \right. \\
 & \quad \left. \left. + 2 \sum_{k=1}^K \sum_{j=i+1}^K \langle \nabla_{\mathbf{v}} f_k^s(\mathbf{v}_{t-1}^k, \alpha_{t-1}^k) - \nabla_{\mathbf{v}} F_k^s(\mathbf{v}_{t-1}^k, \alpha_{t-1}^k; z_{t-1}^k), \nabla_{\mathbf{v}} f_j^s(\mathbf{v}_{t-1}^j, \alpha_{t-1}^j) - \nabla_{\mathbf{v}} F_j^s(\mathbf{v}_{t-1}^j, \alpha_{t-1}^j; z_{t-1}^j) \rangle \right) \right] \\
 & \leq \frac{3\eta\sigma^2}{2K}. \tag{41}
 \end{aligned}$$

The last inequality holds because  $\|\nabla_{\mathbf{v}} f_k(\mathbf{v}_{t-1}^k, \alpha_{t-1}^k) - \nabla_{\mathbf{v}} F_k(\mathbf{v}_{t-1}^k, \alpha_{t-1}^k; z_{t-1}^k)\|^2 \leq \sigma^2$  and  $\mathbb{E}\langle \nabla_{\mathbf{v}} f_k(\mathbf{v}_{t-1}^k, \alpha_{t-1}^k) - \nabla_{\mathbf{v}} F_k(\mathbf{v}_{t-1}^k, \alpha_{t-1}^k; z_{t-1}^k), \nabla_{\mathbf{v}} f_j(\mathbf{v}_{t-1}^j, \alpha_{t-1}^j) - \nabla_{\mathbf{v}} F_j(\mathbf{v}_{t-1}^j, \alpha_{t-1}^j; z_{t-1}^j) \rangle = 0$  for any  $k \neq j$  as each machine draws data

independently. Similarly, we take expectation over  $C_8$  and have

$$\mathbb{E} \left[ \frac{3\eta}{2} \left\| \frac{1}{K} \sum_{k=1}^K [\nabla_{\alpha} f_k(\mathbf{v}_{t-1}^k, \alpha_{t-1}^k) - \nabla_{\alpha} F_k(\mathbf{v}_{t-1}^k, \alpha_{t-1}^k; \mathbf{z}_{t-1}^k)] \right\|^2 \right] \leq \frac{3\eta\sigma^2}{2K}. \quad (42)$$

Plugging (41) and (42) into (97), and taking expectation, it yields

$$\begin{aligned} & \mathbb{E}[f^s(\bar{\mathbf{v}}, \alpha) - f^s(\mathbf{v}, \bar{\alpha})] \\ & \leq \mathbb{E} \left\{ \frac{1}{T} \left( \frac{1}{2\eta} - \frac{\ell}{3} \right) \|\bar{\mathbf{v}}_0 - \mathbf{v}\|^2 + \frac{1}{2\eta T} \|\bar{\mathbf{v}}_0 - \mathbf{v}\|^2 + \frac{1}{T} \left( \frac{1}{2\eta} - \frac{\mu_2}{3} \right) \|\bar{\alpha}_0 - \alpha\|^2 + \frac{1}{2\eta T} \|\bar{\alpha}_0 - \alpha\|^2 \right. \\ & \quad + \frac{1}{T} \sum_{t=1}^T \left( \frac{3\ell^2}{2\mu_2} + \frac{3\ell}{2} \right) \frac{1}{K} \sum_{k=1}^K \|\bar{\mathbf{v}}_{t-1} - \mathbf{v}_{t-1}^k\|^2 + \frac{1}{T} \sum_{t=1}^T \left( \frac{3\ell}{2} + \frac{3\ell^2}{2\mu_2} \right) \frac{1}{K} \sum_{k=1}^K (\bar{\alpha}_{t-1} - \alpha_{t-1}^k)^2 \\ & \quad \left. + \frac{1}{T} \sum_{t=1}^T \frac{3\eta\sigma^2}{K} \right\} \\ & \leq \frac{1}{\eta T} \|\mathbf{v}_0 - \mathbf{v}\|^2 + \frac{1}{\eta T} \|\alpha_0 - \alpha\|^2 + \left( \frac{3\ell^2}{2\mu_2} + \frac{3\ell}{2} \right) (12\eta^2 I \sigma^2 + 36\eta^2 F^2 D^2) \mathbb{I}_{T>1} + \frac{3\eta\sigma^2}{K}, \end{aligned}$$

where we use Lemma 8,  $\mathbf{v}_0 = \bar{\mathbf{v}}_0$ , and  $\alpha_0 = \bar{\alpha}_0$  in the last inequality.  $\square$

### B.3. Main Proof of Theorem 1

*Proof.* Since  $f(\mathbf{v}, \alpha)$  is  $\ell$ -smooth (thus  $\ell$ -weakly convex) in  $\mathbf{v}$  for any  $\alpha$ ,  $\phi(\mathbf{v}) = \max_{\alpha'} f(\mathbf{v}, \alpha')$  is also  $\ell$ -weakly convex. Taking  $\gamma = 2\ell$ , we have

$$\begin{aligned} \phi(\mathbf{v}_{s-1}) & \geq \phi(\mathbf{v}_s) + \langle \partial\phi(\mathbf{v}_s), \mathbf{v}_{s-1} - \mathbf{v}_s \rangle - \frac{\ell}{2} \|\mathbf{v}_{s-1} - \mathbf{v}_s\|^2 \\ & = \phi(\mathbf{v}_s) + \langle \partial\phi(\mathbf{v}_s) + 2\ell(\mathbf{v}_s - \mathbf{v}_{s-1}), \mathbf{v}_{s-1} - \mathbf{v}_s \rangle + \frac{3\ell}{2} \|\mathbf{v}_{s-1} - \mathbf{v}_s\|^2 \\ & \stackrel{(a)}{=} \phi(\mathbf{v}_s) + \langle \partial\phi_s(\mathbf{v}_s), \mathbf{v}_{s-1} - \mathbf{v}_s \rangle + \frac{3\ell}{2} \|\mathbf{v}_{s-1} - \mathbf{v}_s\|^2 \\ & \stackrel{(b)}{=} \phi(\mathbf{v}_s) - \frac{1}{2\ell} \langle \partial\phi_s(\mathbf{v}_s), \partial\phi_s(\mathbf{v}_s) - \partial\phi(\mathbf{v}_s) \rangle + \frac{3}{8\ell} \|\partial\phi_s(\mathbf{v}_s) - \partial\phi(\mathbf{v}_s)\|^2 \\ & = \phi(\mathbf{v}_s) - \frac{1}{8\ell} \|\partial\phi_s(\mathbf{v}_s)\|^2 - \frac{1}{4\ell} \langle \partial\phi_s(\mathbf{v}_s), \partial\phi(\mathbf{v}_s) \rangle + \frac{3}{8\ell} \|\partial\phi(\mathbf{v}_s)\|^2, \end{aligned} \quad (43)$$

where (a) and (b) hold by the definition of  $\phi_s(\mathbf{v})$ .

Rearranging the terms in (43) yields

$$\begin{aligned} \phi(\mathbf{v}_s) - \phi(\mathbf{v}_{s-1}) & \leq \frac{1}{8\ell} \|\partial\phi_s(\mathbf{v}_s)\|^2 + \frac{1}{4\ell} \langle \partial\phi_s(\mathbf{v}_s), \partial\phi(\mathbf{v}_s) \rangle - \frac{3}{8\ell} \|\partial\phi(\mathbf{v}_s)\|^2 \\ & \stackrel{(a)}{\leq} \frac{1}{8\ell} \|\partial\phi_s(\mathbf{v}_s)\|^2 + \frac{1}{8\ell} (\|\partial\phi_s(\mathbf{v}_s)\|^2 + \|\partial\phi(\mathbf{v}_s)\|^2) - \frac{3}{8\ell} \|\partial\phi(\mathbf{v}_s)\|^2 \\ & = \frac{1}{4\ell} \|\partial\phi_s(\mathbf{v}_s)\|^2 - \frac{1}{4\ell} \|\partial\phi(\mathbf{v}_s)\|^2 \\ & \stackrel{(b)}{\leq} \frac{1}{4\ell} \|\partial\phi_s(\mathbf{v}_s)\|^2 - \frac{\mu}{2\ell} (\phi(\mathbf{v}_s) - \phi(\mathbf{v}_*)) \end{aligned} \quad (44)$$

where (a) holds by using  $\langle \mathbf{a}, \mathbf{b} \rangle \leq \frac{1}{2} (\|\mathbf{a}\|^2 + \|\mathbf{b}\|^2)$ , and (b) holds by the  $\mu$ -PL property of  $\phi(\mathbf{v})$ .

Thus, we have

$$(4\ell + 2\mu) (\phi(\mathbf{v}_s) - \phi(\mathbf{v}_*)) - 4\ell (\phi(\mathbf{v}_{s-1}) - \phi(\mathbf{v}_*)) \leq \|\partial\phi_s(\mathbf{v}_s)\|^2. \quad (45)$$

Since  $\gamma = 2\ell$ ,  $f^s(\mathbf{v}, \alpha)$  is  $\ell$ -strongly convex in  $\mathbf{v}$  and  $\mu_2 = 2p(1-p)$  strong concave in  $\alpha$ . Apply Lemma 3 to  $f^s$ , we know that

$$\frac{\ell}{4} \|\hat{\mathbf{v}}_s(\alpha_s) - \mathbf{v}_0^s\|^2 + \frac{\mu_2}{4} \|\hat{\alpha}_s(\mathbf{v}_s) - \alpha_0^s\|^2 \leq \text{Gap}_s(\mathbf{v}_0^s, \alpha_0^s) + \text{Gap}_s(\mathbf{v}_s, \alpha_s). \quad (46)$$

By the setting of  $\eta_s = \eta_0 \exp\left(-\frac{(s-1)2\mu}{c+2\mu}\right)$ , and  $T_s = \frac{212}{\eta_0 \min\{\ell, \mu_2\}} \exp\left(\frac{(s-1)2\mu}{c+2\mu}\right)$ , we note that  $\frac{1}{\eta_s T_s} \leq \frac{\min\{\ell, \mu_2\}}{212}$ . Set  $I_s$  such that  $\left(\frac{3\ell^2}{2\mu_2} + \frac{3\ell}{2}\right) (12\eta_s^2 I_s + 36\eta_s^2 I_s^2 D^2) \leq \frac{\eta_s \sigma^2}{K}$ , where the specific choice of  $I_s$  will be made later. Applying Lemma 1 with  $\hat{\mathbf{v}}_s(\alpha_s) = \arg \min_{\mathbf{v}'} f^s(\mathbf{v}', \alpha_s)$  and  $\hat{\alpha}_s(\mathbf{v}_s) = \arg \max_{\alpha'} f^s(\mathbf{v}_s, \alpha')$ , we have

$$\begin{aligned} \mathbb{E}[\text{Gap}_s(\mathbf{v}_s, \alpha_s)] &\leq \frac{4\eta_s \sigma^2}{K} + \frac{1}{53} \mathbb{E} \left[ \frac{\ell}{4} \|\hat{\mathbf{v}}_s(\alpha_s) - \mathbf{v}_0^s\|^2 + \frac{\mu_2}{4} \|\hat{\alpha}_s(\mathbf{v}_s) - \alpha_0^s\|^2 \right] \\ &\leq \frac{4\eta_s \sigma^2}{K} + \frac{1}{53} \mathbb{E} [\text{Gap}_s(\mathbf{v}_0^s, \alpha_0^s) + \text{Gap}_s(\mathbf{v}_s, \alpha_s)]. \end{aligned} \quad (47)$$

Since  $\phi(\mathbf{v})$  is  $L$ -smooth and  $\gamma = 2\ell$ , then  $\phi_s(\mathbf{v})$  is  $\hat{L} = (L + 2\ell)$ -smooth. According to Theorem 2.1.5 of (Nesterov, 2004), we have

$$\begin{aligned} \mathbb{E}[\|\partial\phi_s(\mathbf{v}_s)\|^2] &\leq 2\hat{L} \mathbb{E}[\phi_s(\mathbf{v}_s) - \min_{x \in \mathbb{R}^d} \phi_s(\mathbf{v})] \leq 2\hat{L} \mathbb{E}[\text{Gap}_s(\mathbf{v}_s, \alpha_s)] \\ &= 2\hat{L} \mathbb{E}[4\text{Gap}_s(\mathbf{v}_s, \alpha_s) - 3\text{Gap}_s(\mathbf{v}_s, \alpha_s)] \\ &\leq 2\hat{L} \mathbb{E} \left[ 4 \left( \frac{4\eta_s \sigma^2}{K} + \frac{1}{53} (\text{Gap}_s(\mathbf{v}_0^s, \alpha_0^s) + \text{Gap}_s(\mathbf{v}_s, \alpha_s)) \right) - 3\text{Gap}_s(\mathbf{v}_s, \alpha_s) \right] \\ &= 2\hat{L} \mathbb{E} \left[ \frac{16\eta_s \sigma^2}{K} + \frac{4}{53} \text{Gap}_s(\mathbf{v}_0^s, \alpha_0^s) - \frac{155}{53} \text{Gap}_s(\mathbf{v}_s, \alpha_s) \right] \end{aligned} \quad (48)$$

Applying Lemma 4 to (48), we have

$$\begin{aligned} \mathbb{E}[\|\partial\phi_s(\mathbf{v}_s)\|^2] &\leq 2\hat{L} \mathbb{E} \left[ \frac{16\eta_s \sigma^2}{K} + \frac{4}{53} \text{Gap}_s(\mathbf{v}_0^s, \alpha_0^s) \right. \\ &\quad \left. - \frac{155}{53} \left( \frac{3}{50} \text{Gap}_{s+1}(\mathbf{v}_0^{s+1}, \alpha_0^{s+1}) + \frac{4}{5} (\phi(\mathbf{v}_0^{s+1}) - \phi(\mathbf{v}_0^s)) \right) \right] \\ &= 2\hat{L} \mathbb{E} \left[ \frac{16\eta_s \sigma^2}{K} + \frac{4}{53} \text{Gap}_s(\mathbf{v}_0^s, \alpha_0^s) - \frac{93}{530} \text{Gap}_{s+1}(\mathbf{v}_0^{s+1}, \alpha_0^{s+1}) - \frac{124}{53} (\phi(\mathbf{v}_0^{s+1}) - \phi(\mathbf{v}_0^s)) \right]. \end{aligned} \quad (49)$$

Combining this with (45), rearranging the terms, and defining a constant  $c = 4\ell + \frac{248}{53} \hat{L} \in O(L + \ell)$ , we get

$$\begin{aligned} &(c + 2\mu) \mathbb{E}[\phi(\mathbf{v}_0^{s+1}) - \phi(\mathbf{v}_*)] + \frac{93}{265} \hat{L} \mathbb{E}[\text{Gap}_{s+1}(\mathbf{v}_0^{s+1}, \alpha_0^{s+1})] \\ &\leq \left( 4\ell + \frac{248}{53} \hat{L} \right) \mathbb{E}[\phi(\mathbf{v}_0^s) - \phi(\mathbf{v}_*)] + \frac{8\hat{L}}{53} \mathbb{E}[\text{Gap}_s(\mathbf{v}_0^s, \alpha_0^s)] + \frac{32\eta_s \hat{L} \sigma^2}{K} \\ &\leq c \mathbb{E} \left[ \phi(\mathbf{v}_0^s) - \phi(\mathbf{v}_*) + \frac{8\hat{L}}{53c} \text{Gap}_s(\mathbf{v}_0^s, \alpha_0^s) \right] + \frac{32\eta_s \hat{L} \sigma^2}{K} \end{aligned} \quad (50)$$

Using the fact that  $\hat{L} \geq \mu$ ,

$$(c + 2\mu) \frac{8\hat{L}}{53c} = \left( 4\ell + \frac{248}{53} \hat{L} + 2\mu \right) \frac{8\hat{L}}{53(4\ell + \frac{248}{53} \hat{L})} \leq \frac{8\hat{L}}{53} + \frac{16\mu\hat{L}}{248\hat{L}} \leq \frac{93}{265} \hat{L}. \quad (51)$$

Then, we have

$$\begin{aligned}
 & (c + 2\mu)\mathbb{E} \left[ \phi(\mathbf{v}_0^{s+1}) - \phi(\mathbf{v}_*) + \frac{8\hat{L}}{53c} \text{Gap}_{s+1}(\mathbf{v}_0^{s+1}, \alpha_0^{s+1}) \right] \\
 & \leq c\mathbb{E} \left[ \phi(\mathbf{v}_0^s) - \phi(\mathbf{v}_*) + \frac{8\hat{L}}{53c} \text{Gap}_s(\mathbf{v}_0^s, \alpha_0^s) \right] + \frac{32\eta_s \hat{L} \sigma^2}{K}.
 \end{aligned} \tag{52}$$

Defining  $\Delta_s = \phi(\mathbf{v}_0^s) - \phi(\mathbf{v}_*) + \frac{8\hat{L}}{53c} \text{Gap}_s(\mathbf{v}_0^s, \alpha_0^s)$ , then

$$\mathbb{E}[\Delta_{s+1}] \leq \frac{c}{c + 2\mu} \mathbb{E}[\Delta_s] + \frac{32\eta_s \hat{L} \sigma^2}{(c + 2\mu)K} \tag{53}$$

Using this inequality recursively, it yields

$$\mathbb{E}[\Delta_{S+1}] \leq \left( \frac{c}{c + 2\mu} \right)^S \mathbb{E}[\Delta_1] + \frac{32\hat{L}\sigma^2}{(c + 2\mu)K} \sum_{s=1}^S \left( \eta_s \left( \frac{c}{c + 2\mu} \right)^{S+1-s} \right) \tag{54}$$

By definition,

$$\begin{aligned}
 \Delta_1 &= \phi(\mathbf{v}_0^1) - \phi(\mathbf{v}^*) + \frac{8\hat{L}}{53c} \widehat{\text{Gap}}_1(\mathbf{v}_0^1, \alpha_0^1) \\
 &= \phi(\mathbf{v}_0) - \phi(\mathbf{v}^*) + \left( f(\mathbf{v}_0, \hat{\alpha}_1(\mathbf{v}_0)) + \frac{\gamma}{2} \|\mathbf{v}_0 - \mathbf{v}_0\|^2 - f(\hat{\mathbf{v}}_1(\alpha_0), \alpha_0) - \frac{\gamma}{2} \|\hat{\mathbf{v}}_1(\alpha_0) - \mathbf{v}_0\|^2 \right) \\
 &\leq \epsilon_0 + f(\mathbf{v}_0, \hat{\alpha}_1(\mathbf{v}_0)) - f(\hat{\mathbf{v}}(\alpha_0), \alpha_0) \leq 2\epsilon_0.
 \end{aligned} \tag{55}$$

Using inequality  $1 - x \leq \exp(-x)$ , we have

$$\begin{aligned}
 \mathbb{E}[\Delta_{S+1}] &\leq \exp\left(\frac{-2\mu S}{c + 2\mu}\right) \mathbb{E}[\Delta_1] + \frac{32\eta_0 \hat{L} \sigma^2}{(c + 2\mu)K} \sum_{s=1}^S \exp\left(-\frac{2\mu S}{c + 2\mu}\right) \\
 &\leq 2\epsilon_0 \exp\left(\frac{-2\mu S}{c + 2\mu}\right) + \frac{32\eta_0 \hat{L} \sigma^2}{(c + 2\mu)K} S \exp\left(-\frac{2\mu S}{c + 2\mu}\right).
 \end{aligned}$$

To make this less than  $\epsilon$ , it suffices to make

$$\begin{aligned}
 2\epsilon_0 \exp\left(\frac{-2\mu S}{c + 2\mu}\right) &\leq \frac{\epsilon}{2} \\
 \frac{32\eta_0 \hat{L} \sigma^2}{(c + 2\mu)K} S \exp\left(-\frac{2\mu S}{c + 2\mu}\right) &\leq \frac{\epsilon}{2}
 \end{aligned} \tag{56}$$

Let  $S$  be the smallest value such that  $\exp\left(\frac{-2\mu S}{c + 2\mu}\right) \leq \min\left\{\frac{\epsilon}{4\epsilon_0}, \frac{(c + 2\mu)K\epsilon}{64\eta_0 \hat{L} S \sigma^2}\right\}$ . We can set  $S = \max\left\{\frac{c + 2\mu}{2\mu} \log \frac{4\epsilon_0}{\epsilon}, \frac{c + 2\mu}{2\mu} \log \frac{64\eta_0 \hat{L} S \sigma^2}{(c + 2\mu)K\epsilon}\right\}$ .

Then, the total iteration complexity is

$$\begin{aligned}
 \sum_{s=1}^S T_s &\leq O\left(\frac{424}{\eta_0 \min\{\ell, \mu_2\}} \sum_{s=1}^S \exp\left((s-1)\frac{2\mu}{c+2\mu}\right)\right) \\
 &\leq O\left(\frac{1}{\eta_0 \min\{\ell, \mu_2\}} \frac{\exp(S\frac{2\mu}{c+2\mu}) - 1}{\exp(\frac{2\mu}{c+2\mu}) - 1}\right) \\
 &\stackrel{(a)}{\leq} \tilde{O}\left(\frac{c}{\eta_0 \mu \min\{\ell, \mu_2\}} \max\left\{\frac{\epsilon_0}{\epsilon}, \frac{\eta_0 \hat{L} S \sigma^2}{(c+2\mu)K\epsilon}\right\}\right) \\
 &\leq \tilde{O}\left(\max\left\{\frac{(L+\ell)\epsilon_0}{\eta_0 \mu \min\{\ell, \mu_2\}\epsilon}, \frac{(L+\ell)^2 \sigma^2}{\mu^2 \min\{\ell, \mu_2\}K\epsilon}\right\}\right) \\
 &\leq \tilde{O}\left(\max\left\{\frac{1}{\mu_1 \mu_2^2 \epsilon}, \frac{1}{\mu_1^2 \mu_2^3 K \epsilon}\right\}\right),
 \end{aligned} \tag{57}$$

where (a) uses the setting of  $S$  and  $\exp(x) - 1 \geq x$ , and  $\tilde{O}$  suppresses logarithmic factors.

$$\eta_s = \eta_0 \exp(-(s-1)\frac{2\mu}{c+2\mu}), T_s = \frac{212}{\eta_0 \mu_2} \exp\left((s-1)\frac{2\mu}{c+2\mu}\right).$$

**Next, we will analyze the communication cost.** We investigate both  $D = 0$  and  $D > 0$  cases.

**(i) Homogeneous Data ( $D = 0$ ):** To assure  $\left(\frac{3\ell^2}{2\mu_2} + \frac{3\ell}{2}\right) (12\eta_s^2 I_s + 36\eta_s^2 I_s^2 D^2) \leq \frac{\eta_s \sigma^2}{K}$  which we used in above proof, we take  $I_s = \frac{1}{MK\eta_s} = \frac{\exp((s-1)\frac{2\mu}{c+2\mu})}{MK\eta_0}$ , where  $M$  is a proper constant.

$$\text{If } \frac{1}{MK\eta_0} > 1, \text{ then } I_s = \max\left(1, \frac{\exp((s-1)\frac{2\mu}{c+2\mu})}{MK\eta_0}\right) = \frac{\exp((s-1)\frac{2\mu}{c+2\mu})}{MK\eta_0}.$$

Otherwise,  $\frac{1}{MK\eta_0} \leq 1$ , then  $K_s = 1$  for  $s \leq S_1 := \frac{c+2\mu}{2\mu} \log(MK\eta_0) + 1$  and  $K_s = \frac{\exp((s-1)\frac{2\mu}{c+2\mu})}{MK\eta_0}$  for  $s > S_1$ .

$$\begin{aligned}
 \sum_{s=1}^{S_1} T_s &= \sum_{s=1}^{S_1} O\left(\frac{212}{\eta_0} \exp\left((s-1)\frac{2\mu}{c+2\mu}\right)\right) \\
 &= \tilde{O}\left(\frac{212}{\eta_0} \frac{\exp\left(\frac{2\mu}{c+2\mu} S_1\right) - 1}{\exp\left(\frac{2\mu}{c+2\mu}\right) - 1}\right) \\
 &= \tilde{O}\left(\frac{K}{\mu}\right)
 \end{aligned} \tag{58}$$

Thus, for both above cases, the total communication complexity can be bounded by

$$\begin{aligned}
 \sum_{s=1}^{S_1} T_s + \sum_{s=S_1+1}^S \frac{T_s}{I_s} \\
 = \tilde{O}\left(\frac{K}{\mu} + KS\right) \leq \tilde{O}\left(\frac{K}{\mu}\right).
 \end{aligned} \tag{59}$$

**(ii) Heterogeneous Data ( $D > 0$ ):**

To assure  $\left(\frac{3\ell^2}{2\mu_2} + \frac{3\ell}{2}\right) (12\eta_s^2 I_s + 36\eta_s^2 I_s^2 D^2) \leq \frac{\eta_s \sigma^2}{K}$  which we used in above proof, we take  $I_s = \frac{1}{M\sqrt{K}\eta_s}$ , where  $M$  is proper constant.

If  $\frac{1}{M\sqrt{N\eta_0}} \leq 1$ , then  $I_s = 1$  for  $s \leq S_2 := \frac{c+2\mu}{2\mu} \log(M^2 K \eta_0) + 1$  and  $I_s = \frac{\exp((s-1)\frac{2\mu}{c+2\mu})}{N\eta_0}$  for  $s > S_2$ .

$$\begin{aligned} \sum_{s=1}^{S_2} T_s &= \sum_{s=1}^{S_2} O\left(\frac{212}{\eta_0} \exp\left((s-1)\frac{2\mu}{c+2\mu}\right)\right) \\ &= \tilde{O}\left(\frac{K}{\mu}\right) \end{aligned} \quad (60)$$

Thus, the communication complexity can be bounded by

$$\begin{aligned} \sum_{s=1}^{S_2} T_s + \sum_{s=S_2+1}^S \frac{T_s}{I_s} &= \tilde{O}\left(\frac{K}{\mu} + \sqrt{K} \exp\left(\frac{(s-1)\frac{2\mu}{c+2\mu}}{2}\right)\right) \\ &\leq \tilde{O}\left(\frac{K}{\mu} + \sqrt{K} \frac{\exp\left(\frac{S}{2} \frac{2\mu}{c+2\mu}\right) - 1}{\exp\frac{\mu}{c+2\mu} - 1}\right) \\ &\leq O\left(\frac{K}{\mu} + \frac{1}{\mu^{3/2}\epsilon^{1/2}}\right). \end{aligned} \quad (61)$$

□

### C. Baseline: Naive Parallel Algorithm

Note that if we set  $I_s = 1$  for all  $s$ , CODA+ will be reduced to a naive parallel version of PPD-SG (Liu et al., 2020). We analyze this naive parallel algorithm in the following theorem.

**Theorem 3.** Consider Algorithm 1 with  $I_s = 1$ . Set  $\gamma = 2\ell$ ,  $\hat{L} = L + 2\ell$ ,  $c = \frac{\mu/\hat{L}}{5+\mu/\hat{L}}$ .

(1) If  $M < \frac{1}{K\mu\epsilon}$ , set  $\eta_s = \eta_0 \exp(-(s-1)c) \leq O(1)$  and  $T_s = \frac{212}{\eta_0 \min\{\ell, \mu_2\}} \exp((s-1)c)$ , then the communication/iteration complexity is  $\tilde{O}\left(\max\left(\frac{\Delta_0}{\mu\epsilon\eta_0 K}, \frac{\hat{L}}{\mu^2 K \epsilon}\right)\right)$  to return  $\mathbf{v}_S$  such that  $\mathbb{E}[\phi(\mathbf{v}_S) - \phi(\mathbf{v}_\phi^*)] \leq \epsilon$ .

(2) If  $M \geq \frac{1}{K\mu\epsilon}$ , set  $\eta_s = \min\left(\frac{1}{3\ell+3\ell^2/\mu_2}, \frac{1}{4\ell}\right)$  and  $T_s = \frac{212}{\eta_s \min\{\ell, \mu_2\}}$ , then the communication/iteration complexity is  $\tilde{O}\left(\frac{1}{\mu}\right)$  to return  $\mathbf{v}_S$  such that  $\mathbb{E}[\phi(\mathbf{v}_S) - \phi(\mathbf{v}_\phi^*)] \leq \epsilon$ .

*Proof.* (1) If  $M < \frac{1}{K\mu\epsilon}$ , note that the setting of  $\eta_s$  and  $T_s$  are identical to that in CODA+ (Theorem 1). However, as a batch of  $M$  is used on each machine at each iteration, the variance at each iteration is reduced to  $\frac{\sigma^2}{KM}$ . Therefore, by similar analysis of Theorem 1 (specifically (57)), we see that the iteration complexity of NPA is  $\tilde{O}\left(\frac{1}{\mu\epsilon} + \frac{1}{\mu^2 KM\epsilon}\right)$ . Thus, the sample complexity of each machines is  $\tilde{O}\left(\frac{M}{\mu\epsilon} + \frac{1}{\mu^2 K\epsilon}\right)$ .

(2) If  $M \geq \frac{1}{K\mu\epsilon}$ , . Note  $\frac{1}{\eta_s T_s} \leq \frac{\min\{\ell, \mu_2\}}{212}$ , we can follow the proof of Theorem 1 and derive

$$\begin{aligned} \Delta_{s+1} &\leq \frac{c}{c+2\mu} \mathbb{E}[\Delta_s] + \frac{32\eta_s \hat{L} \sigma^2}{KM} \\ &\leq \frac{c}{c+2\mu} \mathbb{E}[\Delta_s] + 32\eta_s \hat{L} \sigma^2 \mu \epsilon \end{aligned} \quad (62)$$

where the first inequality is similar to (53) and the  $\Delta$  is defined as that in Theorem 1. Thus,

$$\begin{aligned}\Delta_{S+1} &\leq \left(\frac{c}{c+2\mu}\right)^S + \mu\epsilon O\left(\sum_{s=1}^S \left(\frac{c}{c+2\mu}\right)^{s-1}\right) \\ &\leq \left(\frac{c}{c+2\mu}\right)^S + O(\epsilon) \\ &\leq \exp\left(\frac{-2\mu S}{c+2\mu}\right) + O(\epsilon)\end{aligned}\tag{63}$$

Therefore, it suffices to take  $S = \tilde{O}\left(\frac{1}{\mu}\right)$ . Hence, the total number of communication is  $S \cdot T_s = \tilde{O}\left(\frac{1}{\mu}\right)$  and the sample complexity on each machine is  $\tilde{O}\left(\frac{M}{\mu}\right)$ .  $\square$

## D. Proof of Lemma 2

In this section, we will prove Lemma 2, which is the convergence analysis of one stage in CODASCA.

First, the duality gap in stage  $s$  can be bounded as

**Lemma 9.** For any  $\mathbf{v}, \alpha$ ,

$$\begin{aligned}&\frac{1}{R} \sum_{r=1}^R [f^s(\mathbf{v}_r, \alpha) - f^s(\mathbf{v}, \alpha_r)] \\ &\leq \frac{1}{R} \sum_{r=1}^R \left[ \underbrace{\langle \partial_{\mathbf{v}} f^s(\mathbf{v}_{r-1}, \alpha_{r-1}), \mathbf{v}_r - \mathbf{v} \rangle}_{B4} + \underbrace{\langle \partial_{\alpha} f^s(\mathbf{v}_{r-1}, \alpha_{r-1}), \alpha - \alpha_r \rangle}_{B5} \right. \\ &\quad \left. + \frac{3\ell + 3\ell^2/\mu_2}{2} \|\mathbf{v}_r - \mathbf{v}_{r-1}\|^2 + 2\ell(\alpha_r - \alpha_{r-1})^2 - \frac{\ell}{3} \|\mathbf{v}_{r-1} - \mathbf{v}\|^2 - \frac{\mu_2}{3} (\alpha_{r-1} - \alpha)^2 \right]\end{aligned}$$

*Proof.* By  $\ell$ -strongly convexity of  $f^s(\mathbf{v}, \alpha)$  in  $\mathbf{v}$ , we have

$$f^s(\mathbf{v}_{r-1}, \alpha_{r-1}) + \langle \partial_{\mathbf{v}} f^s(\mathbf{v}_{r-1}, \alpha_{r-1}), \mathbf{v} - \mathbf{v}_{r-1} \rangle + \frac{\ell}{2} \|\mathbf{v}_{r-1} - \mathbf{v}\|^2 \leq f^s(\mathbf{v}, \alpha_{r-1}).\tag{64}$$

By  $3\ell$ -smoothness of  $f^s(\mathbf{v}, \alpha)$  in  $\mathbf{v}$ , we have

$$\begin{aligned}f^s(\mathbf{v}_r, \alpha) &\leq f^s(\mathbf{v}_{r-1}, \alpha) + \langle \partial_{\mathbf{v}} f^s(\mathbf{v}_{r-1}, \alpha), \mathbf{v}_r - \mathbf{v}_{r-1} \rangle + \frac{3\ell}{2} \|\mathbf{v}_r - \mathbf{v}_{r-1}\|^2 \\ &= f^s(\mathbf{v}_{r-1}, \alpha) + \langle \partial_{\mathbf{v}} f^s(\mathbf{v}_{r-1}, \alpha_{r-1}), \mathbf{v}_r - \mathbf{v}_{r-1} \rangle + \frac{3\ell}{2} \|\mathbf{v}_r - \mathbf{v}_{r-1}\|^2 \\ &\quad + \langle \partial_{\mathbf{v}} f^s(\mathbf{v}_{r-1}, \alpha) - \partial_{\mathbf{v}} f^s(\mathbf{v}_{r-1}, \alpha_{r-1}), \mathbf{v}_r - \mathbf{v}_{r-1} \rangle \\ &\stackrel{(a)}{\leq} f^s(\mathbf{v}_{r-1}, \alpha) + \langle \partial_{\mathbf{v}} f^s(\mathbf{v}_{r-1}, \alpha_{r-1}), \mathbf{v}_r - \mathbf{v}_{r-1} \rangle + \frac{3\ell}{2} \|\mathbf{v}_r - \mathbf{v}_{r-1}\|^2 \\ &\quad + \ell |\alpha_{r-1} - \alpha| \|\mathbf{v}_r - \mathbf{v}_{r-1}\| \\ &\stackrel{(b)}{\leq} f^s(\mathbf{v}_{r-1}, \alpha) + \langle \partial_{\mathbf{v}} f^s(\mathbf{v}_{r-1}, \alpha_{r-1}), \mathbf{v}_r - \mathbf{v}_{r-1} \rangle + \frac{3\ell}{2} \|\mathbf{v}_r - \mathbf{v}_{r-1}\|^2 \\ &\quad + \frac{\mu_2}{6} (\alpha_{r-1} - \alpha)^2 + \frac{3\ell^2}{2\mu_2} \|\mathbf{v}_r - \mathbf{v}_{r-1}\|^2,\end{aligned}\tag{65}$$

where (a) holds because that we know  $\partial_{\mathbf{v}} f^s(\mathbf{v}, \alpha)$  is  $\ell$ -Lipschitz in  $\alpha$  since  $f(\mathbf{v}, \alpha)$  is  $\ell$ -smooth and (b) holds by Young's inequality.

Adding (64) and (65), by rearranging terms, we have

$$\begin{aligned}
 & f^s(\mathbf{v}_{r-1}, \alpha_{r-1}) + f^s(\mathbf{v}_r, \alpha) \\
 & \leq f^s(\mathbf{v}, \alpha_{r-1}) + f^s(\mathbf{v}_{r-1}, \alpha) + \langle \partial_{\mathbf{v}} f^s(\mathbf{v}_{r-1}, \alpha_{r-1}), \mathbf{v}_r - \mathbf{v} \rangle \\
 & \quad + \frac{3\ell + 3\ell^2/\mu_2}{2} \|\mathbf{v}_r - \mathbf{v}_{r-1}\|^2 - \frac{\ell}{2} \|\mathbf{v}_{r-1} - \mathbf{v}\|^2 + \frac{\mu_2}{6} (\alpha_{r-1} - \alpha)^2.
 \end{aligned} \tag{66}$$

We know  $f^s(\mathbf{v}, \alpha)$  is  $\mu_2$ -strong concave in  $\alpha$  ( $-f^s(\mathbf{v}, \alpha)$  is  $\mu_2$ -strong convexity of in  $\alpha$ ). Thus, we have

$$-f^s(\mathbf{v}_{r-1}, \alpha_{r-1}) - \langle \partial_{\alpha} f^s(\mathbf{v}_{r-1}, \alpha_{r-1}), \alpha - \alpha_{r-1} \rangle + \frac{\mu_2}{2} (\alpha - \alpha_{r-1})^2 \leq -f^s(\mathbf{v}_{r-1}, \alpha). \tag{67}$$

Since  $f^s(\mathbf{v}, \alpha)$  is  $\ell$ -smooth in  $\alpha$ , we get

$$\begin{aligned}
 -f^s(\mathbf{v}, \alpha_r) & \leq -f^s(\mathbf{v}, \alpha_{r-1}) - \langle \partial_{\alpha} f^s(\mathbf{v}, \alpha_{r-1}), \alpha_r - \alpha_{r-1} \rangle + \frac{\ell}{2} (\alpha_r - \alpha_{r-1})^2 \\
 & = -f^s(\mathbf{v}, \alpha_{r-1}) - \langle \partial_{\alpha} f^s(\mathbf{v}_{r-1}, \alpha_{r-1}), \alpha_r - \alpha_{r-1} \rangle + \frac{\ell}{2} (\alpha_r - \alpha_{r-1})^2 \\
 & \quad - \langle \partial_{\alpha} (f^s(\mathbf{v}, \alpha_{r-1}) - f^s(\mathbf{v}_{r-1}, \alpha_{r-1})), \alpha_r - \alpha_{r-1} \rangle \\
 & \stackrel{(a)}{\leq} -f^s(\mathbf{v}, \alpha_{r-1}) - \langle \partial_{\alpha} f^s(\mathbf{v}_{r-1}, \alpha_{r-1}), \alpha_r - \alpha_{r-1} \rangle + \frac{\ell}{2} (\alpha_r - \alpha_{r-1})^2 \\
 & \quad + \ell \|\mathbf{v} - \mathbf{v}_{r-1}\| |\alpha_r - \alpha_{r-1}| \\
 & \leq -f^s(\mathbf{v}, \alpha_{r-1}) - \langle \partial_{\alpha} f^s(\mathbf{v}_{r-1}, \alpha_{r-1}), \alpha_r - \alpha_{r-1} \rangle + \frac{\ell}{2} (\alpha_r - \alpha_{r-1})^2 \\
 & \quad + \frac{\ell}{6} \|\mathbf{v}_{r-1} - \mathbf{v}\|^2 + \frac{3\ell}{2} (\alpha_r - \alpha_{r-1})^2
 \end{aligned} \tag{68}$$

where (a) holds because that  $\partial_{\alpha} f^s(\mathbf{v}, \alpha)$  is  $\ell$ -Lipschitz in  $\alpha$ .

Adding (67), (68) and arranging terms, we have

$$\begin{aligned}
 -f^s(\mathbf{v}_{r-1}, \alpha_{r-1}) - f^s(\mathbf{v}, \alpha_r) & \leq -f^s(\mathbf{v}_{r-1}, \alpha) - f^s(\mathbf{v}, \alpha_{r-1}) - \langle \partial_{\alpha} f^s(\mathbf{v}_{r-1}, \alpha_{r-1}), \alpha_r - \alpha \rangle \\
 & \quad + 2\ell (\alpha_r - \alpha_{r-1})^2 + \frac{\ell}{6} \|\mathbf{v}_{r-1} - \mathbf{v}\|^2 - \frac{\mu_2}{2} (\alpha - \alpha_{r-1})^2.
 \end{aligned} \tag{69}$$

Adding (66) and (69), we get

$$\begin{aligned}
 & f^s(\mathbf{v}_r, \alpha) - f^s(\mathbf{v}, \alpha_r) \\
 & \leq \langle \partial_{\mathbf{v}} f^s(\mathbf{v}_{r-1}, \alpha_{r-1}), \mathbf{v}_r - \mathbf{v} \rangle - \langle \partial_{\alpha} f^s(\mathbf{v}_{r-1}, \alpha_{r-1}), \alpha_r - \alpha \rangle \\
 & \quad + \frac{3\ell + 3\ell^2/\mu_2}{2} \|\mathbf{v}_r - \mathbf{v}_{r-1}\|^2 + 2\ell (\alpha_r - \alpha_{r-1})^2 \\
 & \quad - \frac{\ell}{3} \|\mathbf{v}_{r-1} - \mathbf{v}\|^2 - \frac{\mu_2}{3} (\alpha_{r-1} - \alpha)^2
 \end{aligned} \tag{70}$$

Taking average over  $r = 1, \dots, R$ , we get

$$\begin{aligned}
 & \frac{1}{R} \sum_{r=1}^R [f^s(\mathbf{v}_r, \alpha) - f^s(\mathbf{v}, \alpha_r)] \\
 & \leq \frac{1}{R} \sum_{r=1}^R \left[ \underbrace{\langle \partial_{\mathbf{v}} f^s(\mathbf{v}_{r-1}, \alpha_{r-1}), \mathbf{v}_r - \mathbf{v} \rangle}_{B_4} + \underbrace{\langle \partial_{\alpha} f^s(\mathbf{v}_{r-1}, \alpha_{r-1}), \alpha_r - \alpha \rangle}_{B_5} \right. \\
 & \quad \left. + \frac{3\ell + 3\ell^2/\mu_2}{2} \|\mathbf{v}_r - \mathbf{v}_{r-1}\|^2 + 2\ell (\alpha_r - \alpha_{r-1})^2 - \frac{\ell}{3} \|\mathbf{v}_{r-1} - \mathbf{v}\|^2 - \frac{\mu_2}{3} (\alpha_{r-1} - \alpha)^2 \right]
 \end{aligned}$$

□



$B_4$  and  $B_5$  can be bounded by the following lemma. For simplicity of notation, we define

$$\Xi_r = \frac{1}{KI} \sum_{k,t} \mathbb{E}[\|\mathbf{v}_{r,t}^k - \mathbf{v}_r\|^2 + (\alpha_{r,t}^k - \alpha_r)^2], \quad (71)$$

which is the drift of the variables between the sequence in  $r$ -th round and the ending point, and

$$\mathcal{E}_r = \frac{1}{KI} \sum_{k,t} \mathbb{E}[\|\mathbf{v}_{r,t}^k - \mathbf{v}_{r-1}\|^2 + (\alpha_{r,t}^k - \alpha_{r-1})^2], \quad (72)$$

which is the drift of the variables between the sequence in  $r$ -th round and the starting point.

$B_4$  can be bounded as

**Lemma 10.**

$$\begin{aligned} & \mathbb{E} \langle \nabla_{\mathbf{v}} f^s(\mathbf{v}_{r-1}, \alpha_{r-1}), \mathbf{v}_r - \mathbf{v} \rangle \\ & \leq \frac{3\ell}{2} \mathcal{E}_r + \frac{\ell}{3} \mathbb{E} \|\tilde{\mathbf{v}}_r - \mathbf{v}\|^2 + \frac{3\tilde{\eta}}{2} \mathbb{E} \left\| \frac{1}{NK} \sum_{i,t} [\nabla_{\mathbf{v}} f_k^s(\mathbf{v}_{r,t}^k, \alpha_{r,t}^k) - \nabla_{\mathbf{v}} F_k^s(\mathbf{v}_{r,t}^k, \alpha_{r,t}^k; z_{r,t}^k)] \right\|^2 \\ & \quad + \frac{1}{2\tilde{\eta}} \mathbb{E} (\|\mathbf{v}_{r-1} - \mathbf{v}\|^2 - \|\mathbf{v}_{r-1} - \mathbf{v}_r\|^2 - \|\mathbf{v}_r - \mathbf{v}\|^2) + \frac{1}{2\tilde{\eta}} \mathbb{E} (\|\tilde{\mathbf{v}}_{r-1} - \mathbf{v}\|^2 - \|\tilde{\mathbf{v}}_r - \mathbf{v}\|^2), \end{aligned}$$

and

$$\begin{aligned} & \mathbb{E} \langle \nabla_{\alpha} f^s(\mathbf{v}_{r-1}, \alpha_{r-1}), y - \alpha_r \rangle \leq \frac{3\ell^2}{2\mu_2} \mathcal{E}_r + \frac{\mu_2}{3} \mathbb{E} (\bar{\alpha}_r - \alpha)^2 \\ & \quad + \frac{3\tilde{\eta}}{2} \mathbb{E} \left( \frac{1}{NK} \sum_{i,t} [\nabla_{\alpha} f_k^s(\mathbf{v}_{r,t}^k, \alpha_{r,t}^k) - \nabla_{\alpha} F_k^s(\mathbf{v}_{r,t}^k, \alpha_{r,t}^k; z_{r,t}^k)] \right)^2 \\ & \quad + \frac{1}{2\tilde{\eta}} \mathbb{E} ((\bar{\alpha}_{r-1} - \alpha)^2 - (\bar{\alpha}_{r-1} - \bar{\alpha}_r)^2 - (\bar{\alpha}_r - \alpha)^2) + \frac{1}{2\tilde{\eta}} \mathbb{E} ((\alpha - \bar{\alpha}_{r-1})^2 - (\alpha - \bar{\alpha}_r)^2). \end{aligned}$$

*Proof.*

$$\begin{aligned} & \langle \nabla_{\mathbf{v}} f^s(\mathbf{v}_{r-1}, \alpha_{r-1}), \mathbf{v}_r - \mathbf{v} \rangle \\ & = \left\langle \frac{1}{KI} \sum_{k,t} \nabla_{\mathbf{v}} f_k^s(\mathbf{v}_{r-1}, \alpha_{r-1}), \mathbf{v}_r - \mathbf{v} \right\rangle \\ & \leq \left\langle \frac{1}{KI} \sum_{k,t} [\nabla_{\mathbf{v}} f_k^s(\mathbf{v}_{r-1}, \alpha_{r-1}) - \nabla_{\mathbf{v}} f_k^s(\mathbf{v}_{r-1}, \alpha_{r,t}^k)], \mathbf{v}_r - \mathbf{v} \right\rangle \quad \textcircled{1} \\ & \quad + \left\langle \frac{1}{KI} \sum_{i,t} [\nabla_{\mathbf{v}} f_k^s(\mathbf{v}_{r-1}, \alpha_{r,t}^k) - \nabla_{\mathbf{v}} f_k^s(\mathbf{v}_{r,t}^k, \alpha_{r,t}^k)], \mathbf{v}_r - \mathbf{v} \right\rangle \quad \textcircled{2} \\ & \quad + \left\langle \frac{1}{KI} \sum_{k,t} [\nabla_{\mathbf{v}} f_k^s(\mathbf{v}_{r,t}^k, \alpha_{r,t}^k) - \nabla_{\mathbf{v}} F_k^s(\mathbf{v}_{r,t}^k, \alpha_{r,t}^k; z_{r,t}^k)], \mathbf{v}_r - \mathbf{v} \right\rangle \quad \textcircled{3} \\ & \quad + \left\langle \frac{1}{KI} \sum_{k,t} \nabla_{\mathbf{v}} F_k^s(\mathbf{v}_{r,t}^k, \alpha_{r,t}^k; z_{r,t}^k), \mathbf{v}_r - \mathbf{v} \right\rangle \quad \textcircled{4} \end{aligned} \quad (73)$$

Then we will bound ①, ② and ③, respectively,

$$\begin{aligned}
 \textcircled{1} &\stackrel{(a)}{\leq} \frac{3}{2\ell} \left\| \frac{1}{KI} \sum_{k,t} [\nabla_{\mathbf{v}} f_k^s(\mathbf{v}_{r-1}, \alpha_{r-1}) - \nabla_{\mathbf{v}} f_k^s(\mathbf{v}_{r-1}, \alpha_{r,t}^k)] \right\|^2 + \frac{\ell}{6} \|\mathbf{v}_r - \mathbf{v}\|^2 \\
 &\stackrel{(b)}{\leq} \frac{3}{2\ell} \frac{1}{KI} \sum_{k,t} \|\nabla_{\mathbf{v}} f_k^s(\mathbf{v}_{r-1}, \alpha_{r-1}) - \nabla_{\mathbf{v}} f_k^s(\mathbf{v}_{r-1}, \alpha_{r,t}^k)\|^2 + \frac{\ell}{6} \|\mathbf{v}_r - \mathbf{v}\|^2 \\
 &\stackrel{(c)}{\leq} \frac{3\ell}{2} \frac{1}{KI} \sum_{k,t} \|\alpha_{r-1} - \alpha_{r,t}^k\|^2 + \frac{\ell}{6} \|\mathbf{v}_r - \mathbf{v}\|^2,
 \end{aligned} \tag{74}$$

where (a) follows from Young's inequality, (b) follows from Jensen's inequality. and (c) holds because  $\nabla_{\mathbf{v}} f_k^s(\mathbf{v}, \alpha)$  is  $\ell$ -smooth in  $\alpha$ . Using similar techniques, we have

$$\begin{aligned}
 \textcircled{2} &\leq \frac{3}{2\ell} \frac{1}{KI} \sum_{k,t} \|\nabla_{\mathbf{v}} f_k^s(\mathbf{v}_{r-1}, \alpha_{r,t}^k) - \nabla_{\mathbf{v}} f_k^s(\mathbf{v}_{r,t}^k, \alpha_{r,t}^k)\|^2 + \frac{\ell}{6} \|\mathbf{v}_r - \mathbf{v}\|^2 \\
 &\leq \frac{3\ell}{2} \frac{1}{KI} \sum_{k,t} \|\mathbf{v}_{r-1} - \mathbf{v}_{r,t}^k\|^2 + \frac{\ell}{6} \|\mathbf{v}_r - \mathbf{v}\|^2.
 \end{aligned} \tag{75}$$

Let  $\hat{\mathbf{v}}_r = \arg \min_{\mathbf{v}} \left( \frac{1}{KI} \sum_{k,t} \nabla_{\mathbf{v}} f_k^s(\mathbf{v}_{r,t}^k, y_{r,t}^k) \right)^\top \mathbf{v} + \frac{1}{2\tilde{\eta}} \|\mathbf{v} - \mathbf{v}_{r-1}\|^2$ , then we have

$$\bar{\mathbf{v}}_r - \hat{\mathbf{v}}_r = \frac{\tilde{\eta}}{KI} \sum_{k,t} \left( \nabla_{\mathbf{v}} f_k^s(\mathbf{v}_{r,t}^k, \alpha_{r,t}^k) - \nabla_{\mathbf{v}} f_k^s(\mathbf{v}_{r,t}^k, y_{r,t}^k; z_{r,t}^k) \right). \tag{76}$$

Hence we get

$$\begin{aligned}
 \textcircled{3} &= \left\langle \frac{1}{KI} \sum_{k,t} [\nabla_{\mathbf{v}} f_k^s(\mathbf{v}_{r,t}^k, \alpha_{r,t}^k) - \nabla_{\mathbf{v}} F_k^s(\mathbf{v}_{r,t}^k, \alpha_{r,t}^k; z_{r,t}^k)], \mathbf{v}_r - \hat{\mathbf{v}}_r \right\rangle \\
 &\quad + \left\langle \frac{1}{KI} \sum_{k,t} [\nabla_{\mathbf{v}} f_k^s(\mathbf{v}_{r,t}^k, \alpha_{r,t}^k) - \nabla_{\mathbf{v}} F_k^s(\mathbf{v}_{r,t}^k, \alpha_{r,t}^k; z_{r,t}^k)], \hat{\mathbf{v}}_r - \mathbf{v} \right\rangle \\
 &= \tilde{\eta} \left\| \frac{1}{KI} \sum_{k,t} [\nabla_{\mathbf{v}} f_k^s(\mathbf{v}_{r,t}^k, \alpha_{r,t}^k) - \nabla_{\mathbf{v}} F_k^s(\mathbf{v}_{r,t}^k, \alpha_{r,t}^k; z_{r,t}^k)] \right\|^2 \\
 &\quad + \left\langle \frac{1}{KI} \sum_{k,t} [\nabla_{\mathbf{v}} f_k^s(\mathbf{v}_{r,t}^k, \alpha_{r,t}^k) - \nabla_{\mathbf{v}} F_k^s(\mathbf{v}_{r,t}^k, \alpha_{r,t}^k; z_{r,t}^k)], \hat{\mathbf{v}}_r - \mathbf{v} \right\rangle.
 \end{aligned} \tag{77}$$

Define another auxiliary sequence as

$$\tilde{\mathbf{v}}_r = \tilde{\mathbf{v}}_{r-1} - \frac{\tilde{\eta}}{KI} \sum_{k,t} (\nabla_{\mathbf{v}} F_k^s(\mathbf{v}_{r,t}^k, y_{r,t}^k; z_{r,t}^k) - \nabla_{\mathbf{v}} f_k^s(\mathbf{v}_{r,t}^k, \alpha_{r,t}^k)), \text{ for } r > 0; \tilde{\mathbf{v}}_0 = \mathbf{v}_0. \tag{78}$$

Denote

$$\Theta_r(\mathbf{v}) = \left( \frac{1}{KI} \sum_{k,t} (\nabla_{\mathbf{v}} F_k^s(\mathbf{v}_{r,t}^k, y_{r,t}^k; z_{r,t}^k) - \nabla_{\mathbf{v}} f_k^s(\mathbf{v}_{r,t}^k, \alpha_{r,t}^k)) \right)^\top \mathbf{v} + \frac{1}{2\tilde{\eta}} \|\mathbf{v} - \tilde{\mathbf{v}}_{r-1}\|^2. \tag{79}$$

Hence, for the auxiliary sequence  $\tilde{\alpha}_r$ , we can verify that

$$\tilde{\mathbf{v}}_r = \arg \min_{\mathbf{v}} \Theta_r(\mathbf{v}). \tag{80}$$

Since  $\Theta_r(\mathbf{v})$  is  $\frac{1}{\tilde{\eta}}$ -strongly convex, we have

$$\begin{aligned}
 & \frac{1}{2\tilde{\eta}}\|\mathbf{v} - \tilde{\mathbf{v}}_r\|^2 \leq \Theta_r(\mathbf{v}) - \Theta_r(\tilde{\mathbf{v}}_r) \\
 & = \left( \frac{1}{KI} \sum_{k,t} (\nabla_{\mathbf{v}} F_k^s(\mathbf{v}_{r,t}^k, \alpha_{r,t}^k; z_{r,t}^k) - \nabla_{\mathbf{v}} f_k^s(\mathbf{v}_{r,t}^k, \alpha_{r,t}^k)) \right)^\top \mathbf{v} + \frac{1}{2\tilde{\eta}}\|\mathbf{v} - \tilde{\mathbf{v}}_{r-1}\|^2 \\
 & \quad - \left( \frac{1}{KI} \sum_{k,t} (\nabla_{\mathbf{v}} F_k^s(\mathbf{v}_{r,t}^k, \alpha_{r,t}^k; z_{r,t}^k) - \nabla_{\mathbf{v}} f_k^s(\mathbf{v}_{r,t}^k, \alpha_{r,t}^k)) \right)^\top \tilde{\mathbf{v}}_r - \frac{1}{2\tilde{\eta}}\|\tilde{\mathbf{v}}_r - \tilde{\mathbf{v}}_{r-1}\|^2 \\
 & = \left( \frac{1}{KI} \sum_{k,t} (\nabla_{\mathbf{v}} F_k^s(\mathbf{v}_{r,t}^k, \alpha_{r,t}^k; z_{r,t}^k) - \nabla_{\mathbf{v}} f_k^s(\mathbf{v}_{r,t}^k, \alpha_{r,t}^k)) \right)^\top (\mathbf{v} - \tilde{\mathbf{v}}_{r-1}) + \frac{1}{2\tilde{\eta}}\|\mathbf{v} - \tilde{\mathbf{v}}_{r-1}\|^2 \\
 & \quad - \left( \frac{1}{KI} \sum_{k,t} (\nabla_{\mathbf{v}} F_k^s(\mathbf{v}_{r,t}^k, \alpha_{r,t}^k; z_{r,t}^k) - \nabla_{\mathbf{v}} f_k^s(\mathbf{v}_{r,t}^k, \alpha_{r,t}^k)) \right)^\top (\tilde{\mathbf{v}}_r - \tilde{\mathbf{v}}_{r-1}) - \frac{1}{2\tilde{\eta}}\|\tilde{\mathbf{v}}_r - \tilde{\mathbf{v}}_{r-1}\|^2 \\
 & \leq \left( \frac{1}{KI} \sum_{k,t} (\nabla_{\mathbf{v}} F_k^s(\mathbf{v}_{r,t}^k, \alpha_{r,t}^k; z_{r,t}^k) - \nabla_{\mathbf{v}} f_k^s(\mathbf{v}_{r,t}^k, \alpha_{r,t}^k)) \right)^\top (\mathbf{v} - \tilde{\mathbf{v}}_{r-1}) + \frac{1}{2\tilde{\eta}}\|\mathbf{v} - \tilde{\mathbf{v}}_{r-1}\|^2 \\
 & \quad + \frac{\tilde{\eta}}{2} \left\| \frac{1}{KI} \sum_{k,t} (\nabla_{\mathbf{v}} F_k^s(\mathbf{v}_{r,t}^k, \alpha_{r,t}^k; z_{r,t}^k) - \nabla_{\mathbf{v}} f_k^s(\mathbf{v}_{r,t}^k, \alpha_{r,t}^k)) \right\|^2
 \end{aligned} \tag{81}$$

Adding this with (77), we get

$$\begin{aligned}
 \textcircled{3} & \leq \frac{3\tilde{\eta}}{2} \left\| \frac{1}{KI} \sum_{k,t} (\nabla_{\mathbf{v}} F_k^s(\mathbf{v}_{r,t}^k, \alpha_{r,t}^k; z_{r,t}^k) - \nabla_{\mathbf{v}} f_k^s(\mathbf{v}_{r,t}^k, \alpha_{r,t}^k)) \right\|^2 + \frac{1}{2\tilde{\eta}}\|\mathbf{v} - \tilde{\mathbf{v}}_{r-1}\|^2 - \frac{1}{2\tilde{\eta}}\|\mathbf{v} - \tilde{\mathbf{v}}_r\|^2 \\
 & \quad + \left\langle \frac{1}{KI} \sum_{k,t} [\nabla_{\mathbf{v}} f_k^s(\mathbf{v}_{r,t}^k, \alpha_{r,t}^k) - \nabla_{\mathbf{v}} F_k^s(\mathbf{v}_{r,t}^k, \alpha_{r,t}^k; z_{r,t}^k)], \hat{\mathbf{v}}_r - \tilde{\mathbf{v}}_{r-1} \right\rangle
 \end{aligned} \tag{82}$$

④ can be bounded as

$$\textcircled{4} = \frac{1}{\tilde{\eta}} \langle \mathbf{v}_r - \mathbf{v}_{r-1}, \mathbf{v} - \mathbf{v}_r \rangle = \frac{1}{2\tilde{\eta}} (\|\mathbf{v}_{r-1} - \mathbf{v}\|^2 - \|\mathbf{v}_{r-1} - \mathbf{v}_r\|^2 - \|\mathbf{v}_r - \mathbf{v}\|^2) \tag{83}$$

Plug (74), (75), (82) and (83) into (73), we get

$$\begin{aligned}
 & \mathbb{E} \langle \nabla_{\mathbf{v}} f^s(\mathbf{v}_{r-1}, \alpha_{r-1}), \mathbf{v}_r - \mathbf{v} \rangle \\
 & \leq \frac{3\ell}{2} \mathcal{E}_r + \frac{\ell}{3} \mathbb{E} \|\tilde{\mathbf{v}}_r - \mathbf{v}\|^2 + \frac{3\tilde{\eta}}{2} \mathbb{E} \left\| \frac{1}{KI} \sum_{k,t} [\nabla_{\mathbf{v}} f_k^s(\mathbf{v}_{r,t}^k, \alpha_{r,t}^k) - \nabla_{\mathbf{v}} F_k^s(\mathbf{v}_{r,t}^k, \alpha_{r,t}^k; z_{r,t}^k)] \right\|^2 \\
 & \quad + \frac{1}{2\tilde{\eta}} \mathbb{E} (\|\mathbf{v}_{r-1} - \mathbf{v}\|^2 - \|\mathbf{v}_{r-1} - \mathbf{v}_r\|^2 - \|\mathbf{v}_r - \mathbf{v}\|^2) + \frac{1}{2\tilde{\eta}} \mathbb{E} (\|\tilde{\mathbf{v}}_{r-1} - \mathbf{v}\|^2 - \|\tilde{\mathbf{v}}_r - \mathbf{v}\|^2)
 \end{aligned}$$

Similarly for  $\alpha$ , noting  $f_k^s$  is  $\ell$ -smooth and  $\mu_2$ -strongly concave in  $\alpha$ ,

$$\begin{aligned}
 & \mathbb{E} \langle \nabla_{\alpha} f^s(\mathbf{v}_{r-1}, \alpha_{r-1}), y - \alpha_r \rangle \leq \frac{3\ell^2}{2\mu_2} \mathcal{E}_r + \frac{\mu_2}{3} \mathbb{E} (\bar{\alpha}_r - \alpha)^2 \\
 & \quad + \frac{3\tilde{\eta}}{2} \mathbb{E} \left( \frac{1}{KI} \sum_{k,t} [\nabla_{\alpha} f_k^s(\mathbf{v}_{r,t}^k, \alpha_{r,t}^k) - \nabla_{\alpha} F_k^s(\mathbf{v}_{r,t}^k, \alpha_{r,t}^k; z_{r,t}^k)] \right)^2 \\
 & \quad + \frac{1}{2\tilde{\eta}} \mathbb{E} ((\bar{\alpha}_{r-1} - \alpha)^2 - (\bar{\alpha}_{r-1} - \bar{\alpha}_r)^2 - (\bar{\alpha}_r - \alpha)^2) + \frac{1}{2\tilde{\eta}} \mathbb{E} ((\alpha - \tilde{\alpha}_{r-1})^2 - (\alpha - \tilde{\alpha}_r)^2)
 \end{aligned}$$

□

We show the following lemmas where  $\Xi$  and  $\mathcal{E}$  are coupled.

**Lemma 11.**

$$\Xi_r \leq 4\mathcal{E}_r + 8\tilde{\eta}^2[\|\nabla_{\mathbf{v}}f(\mathbf{v}_r, \alpha_r)\|^2 + \|\nabla_{\alpha}f(\mathbf{v}_r, \alpha_r)\|^2] + \frac{5\tilde{\eta}^2\sigma^2}{KI}. \quad (84)$$

*Proof.*

$$\begin{aligned} \mathbb{E}[\|\mathbf{v}_r - \mathbf{v}_{r-1}\|^2] &= \mathbb{E}\left\|\left[-\frac{\tilde{\eta}}{KI} \sum_{k,t} (\nabla_{\mathbf{v}}f_k^s(\mathbf{v}_{r,t}^k, \alpha_{r,t}^k; z_{r,t}^k) - c_{\mathbf{v}}^k + c_{\mathbf{v}})\right]\right\|^2 \\ &= \mathbb{E}\left\|\left[-\frac{\tilde{\eta}}{KI} \sum_{k,t} [\nabla_{\mathbf{v}}f_k^s(\mathbf{v}_{r,t}^k, \alpha_{r,t}^k; z_{r,t}^k) - \nabla_{\mathbf{v}}f_k^s(\mathbf{v}_{r,t}^k, \alpha_{r,t}^k) + \nabla_{\mathbf{v}}f_k^s(\mathbf{v}_{r,t}^k, \alpha_{r,t}^k)]\right]\right\|^2 \\ &\leq \mathbb{E}\left\|\left[-\frac{\tilde{\eta}}{KI} \sum_{k,t} [\nabla_{\mathbf{v}}f_k^s(\mathbf{v}_{r,t}^k, \alpha_{r,t}^k)]\right]\right\|^2 + \frac{\tilde{\eta}^2\sigma^2}{KI} \\ &= \mathbb{E}\left\|\left[-\frac{\tilde{\eta}}{KI} \sum_{k,t} [\nabla_{\mathbf{v}}f_k^s(\mathbf{v}_{r,t}^k, \alpha_{r,t}^k) - \nabla_{\mathbf{v}}f_k^s(\mathbf{v}_{r-1}, \alpha_{r-1})] + \tilde{\eta}\nabla_{\mathbf{v}}f^s(\mathbf{v}_{r-1}, \alpha_{r-1})\right]\right\|^2 + \frac{\tilde{\eta}^2\sigma^2}{KI} \\ &\leq 2\mathbb{E}\left\|\left[-\frac{\tilde{\eta}}{KI} \sum_{k,t} [\nabla_{\mathbf{v}}f_k^s(\mathbf{v}_{r,t}^k, \alpha_{r,t}^k) - \nabla_{\mathbf{v}}f_k^s(\mathbf{v}_{r-1}, \alpha_{r-1})]\right]\right\|^2 + 2\tilde{\eta}^2\mathbb{E}\|\nabla_{\mathbf{v}}f^s(\mathbf{v}_{r-1}, \alpha_{r-1})\|^2 + \frac{\tilde{\eta}^2\sigma^2}{KI} \\ &\leq \frac{2\tilde{\eta}^2\ell^2}{KI} \sum_{k,t} \mathbb{E}[\|\mathbf{v}_{r,t}^k - \mathbf{v}_{r-1}\|^2 + (\alpha_{r,t}^k - \alpha_{r-1})^2] + 2\tilde{\eta}^2\mathbb{E}\|\nabla_{\mathbf{v}}f^s(\mathbf{v}_{r-1}, \alpha_{r-1})\|^2 + \frac{\tilde{\eta}^2\sigma^2}{KI} \\ &\leq 2\tilde{\eta}^2\ell^2\mathcal{E}_r + 2\tilde{\eta}^2\mathbb{E}\|\nabla_{\mathbf{v}}f^s(\mathbf{v}_{r-1}, \alpha_{r-1})\|^2 + \frac{\tilde{\eta}^2\sigma^2}{KI} \end{aligned} \quad (85)$$

Similarly,

$$\mathbb{E}[(\alpha_r - \alpha_{r-1})^2] \leq 2\tilde{\eta}^2\ell^2\mathcal{E}_r + 2\tilde{\eta}^2\mathbb{E}(\nabla_{\alpha}f^s(\mathbf{v}_{r-1}, \alpha_{r-1}))^2 + \frac{\tilde{\eta}^2\sigma^2}{KI}. \quad (86)$$

Using the  $3\ell$ -smoothness of  $f^s$  and combining with above results,

$$\begin{aligned} &\|\nabla_{\mathbf{v}}f^s(\mathbf{v}_{r-1}, \alpha_{r-1})\|^2 + (\nabla_{\alpha}f^s(\mathbf{v}_{r-1}, \alpha_{r-1}))^2 \\ &= \|\nabla_{\mathbf{v}}f^s(\mathbf{v}_{r-1}, \alpha_{r-1}) - \nabla_{\mathbf{v}}f^s(\mathbf{v}_r, \alpha_r) + \nabla_{\mathbf{v}}f^s(\mathbf{v}_r, \alpha_r)\|^2 + (\nabla_{\alpha}f^s(\mathbf{v}_{r-1}, \alpha_{r-1}) - \nabla_{\alpha}f^s(\mathbf{v}_r, \alpha_r) + \nabla_{\alpha}f^s(\mathbf{v}_r, \alpha_r))^2 \\ &\leq 2[\|\nabla_{\mathbf{v}}f^s(\mathbf{v}_r, \alpha_r)\|^2 + \|\nabla_{\alpha}f^s(\mathbf{v}_r, \alpha_r)\|^2] + 18\ell^2(\|\mathbf{v}_{r-1} - \mathbf{v}_r\|^2 + (\alpha_{r-1} - \alpha_r)^2) \\ &\leq 2[\|\nabla_{\mathbf{v}}f^s(\mathbf{v}_r, \alpha_r)\|^2 + \|\nabla_{\alpha}f^s(\mathbf{v}_r, \alpha_r)\|^2] + 60\ell^4\tilde{\eta}^2\mathcal{E}_r + \frac{40\tilde{\eta}^2\ell^2\sigma^2}{KI} \\ &\leq 2[\|\nabla_{\mathbf{v}}f^s(\mathbf{v}_r, \alpha_r)\|^2 + \|\nabla_{\alpha}f^s(\mathbf{v}_r, \alpha_r)\|^2] + \frac{\ell^2}{24}\mathcal{E}_r + \frac{\sigma^2}{144KI}. \end{aligned} \quad (87)$$

$$\begin{aligned}
 \Xi_r &= \frac{1}{KI} \sum_{k,t} \mathbb{E}[\|\mathbf{v}_{r,t}^k - \mathbf{v}_r\|^2 + (\alpha_{r,t}^k - \alpha_r)^2] \\
 &\leq \frac{2}{KI} \sum_{k,t} \mathbb{E}[\|\mathbf{v}_{r,t}^k - \mathbf{v}_{r-1}\|^2 + \|\mathbf{v}_{r-1} - \mathbf{v}_r\|^2 + (\alpha_{r,t}^k - \alpha_{r-1})^2 + (\alpha_{r-1} - \alpha_r)^2] \\
 &\leq 2\mathcal{E}_r + 2\mathbb{E}[\|\mathbf{v}_{r-1} - \mathbf{v}_r\|^2 + (\alpha_{r-1} - \alpha_r)^2] \\
 &\leq 2\mathcal{E}_r + 8\tilde{\eta}^2 \ell^2 \mathcal{E}_r + 4\tilde{\eta}^2 \mathbb{E}[(\nabla_{\mathbf{v}} f^s(\mathbf{v}_{r-1}, \alpha_{r-1}))^2 + (\nabla_{\alpha} f^s(\mathbf{v}_{r-1}, \alpha_{r-1}))^2] + \frac{4\tilde{\eta}^2 \sigma^2}{KI} \\
 &\leq 3\mathcal{E}_r + 4\tilde{\eta}^2 \left( 2[\|\nabla_{\mathbf{v}} f^s(\mathbf{v}_r, \alpha_r)\|^2 + (\nabla_{\alpha} f^s(\mathbf{v}_r, \alpha_r))^2] + \frac{\ell^2}{24} \mathcal{E}_r + \frac{\sigma^2}{144KI} \right) + \frac{4\tilde{\eta}^2 \sigma^2}{KI} \\
 &\leq 4\mathcal{E}_r + 8\tilde{\eta}^2 [\|\nabla_{\mathbf{v}} f^s(\mathbf{v}_r, \alpha_r)\|^2 + (\nabla_{\alpha} f^s(\mathbf{v}_r, \alpha_r))^2] + \frac{5\tilde{\eta}^2 \sigma^2}{KI}.
 \end{aligned} \tag{88}$$

□

**Lemma 12.**

$$\mathcal{E}_r \leq \frac{\tilde{\eta} \sigma^2}{2\ell K \eta_g^2} + \tilde{\eta} \ell \Xi_{r-1} + \frac{48\tilde{\eta}^2}{\eta_g^2} [\|\nabla_{\mathbf{v}} f^s(\mathbf{v}_r, \alpha_r)\|^2 + \|\nabla_{\alpha} f^s(\mathbf{v}_r, \alpha_r)\|^2]. \tag{89}$$

*Proof.*

$$\begin{aligned}
 \mathbb{E}\|\mathbf{v}_{r,t}^k - \mathbf{v}_{r-1}\|^2 &= \mathbb{E}\|\mathbf{v}_{r,t-1}^k - \eta_l(\nabla_{\mathbf{v}} f_k(\mathbf{v}_{r,t-1}^k, y_{r,t-1}^k; z_{r,t-1}^k) - \mathbf{c}_{\mathbf{v}}^k + \mathbf{c}_{\mathbf{v}}) - \mathbf{v}_{r-1}\|^2 \\
 &\leq \mathbb{E}\|\mathbf{v}_{r,t-1}^k - \eta_l(\nabla_{\mathbf{v}} f_k(\mathbf{v}_{r,t-1}^k, y_{r,t-1}^k) - \mathbb{E}[\mathbf{c}_{\mathbf{v}}^k] + \mathbb{E}[\mathbf{c}_{\mathbf{v}}]) - \mathbf{v}_{r-1}\|^2 + 2\eta_l^2 \sigma^2 \\
 &\leq \left(1 + \frac{1}{I-1}\right) \mathbb{E}\|\mathbf{v}_{r,t-1}^k - \mathbf{v}_{r-1}\|^2 + I\eta_l^2 \mathbb{E}\|\nabla_{\mathbf{v}} f_k(\mathbf{v}_{r,t-1}^k, \alpha_{r,t-1}^k) - \mathbb{E}[\mathbf{c}_{\mathbf{v}}^k] + \mathbb{E}[\mathbf{c}_{\mathbf{v}}]\|^2 + 2\eta_l^2 \sigma^2,
 \end{aligned} \tag{90}$$

where  $\mathbb{E}[\mathbf{c}_{\mathbf{v}}^k] = \frac{1}{I} \sum_{t=1}^I f^s(\mathbf{v}_{r,t}^k, \alpha_{r,t}^k)$  and  $\mathbb{E}[\mathbf{c}_{\mathbf{v}}] = \frac{1}{K} \sum_{k=1}^K \frac{1}{I} \sum_{t=1}^I f^s(\mathbf{v}_{r,t}^k, \alpha_{r,t}^k)$ .

Then,

$$\begin{aligned}
 &I\eta_l^2 \mathbb{E}\|\nabla_{\mathbf{v}} f_k^s(\mathbf{v}_{r,t-1}^k, \alpha_{r,t-1}^k) - \mathbb{E}[\mathbf{c}_{\mathbf{v}}^k] + \mathbb{E}[\mathbf{c}_{\mathbf{v}}]\|^2 \\
 &\leq I\eta_l^2 \mathbb{E}\|\nabla_{\mathbf{v}} f_k^s(\mathbf{v}_{r,t-1}^k, \alpha_{r,t-1}^k) - \nabla_{\mathbf{v}} f_k^s(\mathbf{v}_{r-1}, \alpha_{r-1}) + (\mathbb{E}[\mathbf{c}_{\mathbf{v}}] - \nabla_{\mathbf{v}} f^s(\mathbf{v}_{r-1}, \alpha_{r-1})) \\
 &\quad + \nabla_{\mathbf{v}} f^s(\mathbf{v}_{r-1}, \alpha_{r-1}) - (\mathbb{E}[\mathbf{c}_{\mathbf{v}}^k] - \nabla_{\mathbf{v}} f_k^s(\mathbf{v}_{r-1}, \alpha_{r-1}))\|^2 \\
 &\leq 4I\eta_l^2 \ell^2 \left( \mathbb{E}[\|\mathbf{v}_{r,t-1}^k - \mathbf{v}_{r-1}\|^2] + \mathbb{E}[\|\alpha_{r,t-1}^k - \alpha_{r-1}\|^2] \right) + 4I\eta_l^2 \mathbb{E}[\|\mathbb{E}[\mathbf{c}_{\mathbf{v}}^k] - \nabla_{\mathbf{v}} f_k^s(\mathbf{v}_{r-1}, \alpha_{r-1})\|^2] \\
 &\quad + 4I\eta_l^2 \mathbb{E}[\|\mathbb{E}[\mathbf{c}_{\mathbf{v}}] - \nabla_{\mathbf{v}} f^s(\mathbf{v}_{r-1}, \alpha_{r-1})\|^2] + 4I\eta_l^2 \mathbb{E}[\|\nabla_{\mathbf{v}} f^s(\mathbf{v}_{r-1}, \alpha_{r-1})\|^2] \\
 &\leq 4I\eta_l^2 \ell^2 \left( \mathbb{E}[\|\mathbf{v}_{k-1,r}^k - \mathbf{v}_{r-1}\|^2] + \mathbb{E}[\|\alpha_{k-1,r}^k - \alpha_{r-1}\|^2] \right) + 4I\eta_l^2 \ell^2 \frac{1}{I} \sum_{\tau=1}^I \mathbb{E}[\|\mathbf{v}_{r-1,\tau}^k - \mathbf{v}_{r-1}\|^2 + \|\alpha_{r-1,\tau}^k - \alpha_{r-1}\|^2] \\
 &+ 4I\eta_l^2 \ell^2 \frac{1}{KI} \sum_{j=1}^K \sum_{t=1}^I \mathbb{E}[\|\mathbf{v}_{r-1,t}^j - \mathbf{v}_{r-1}\|^2 + \|\alpha_{r-1,t}^j - \alpha_{r-1}\|^2] + 4I\eta_l^2 \mathbb{E}[\|\nabla_{\mathbf{v}} f^s(\mathbf{v}_{r-1}, \alpha_{r-1})\|^2]
 \end{aligned} \tag{91}$$

For  $\alpha$ , we have similar results, adding them together

$$\begin{aligned}
 \mathbb{E}\|\mathbf{v}_{k,r}^k - \mathbf{v}_{r-1}\|^2 + \mathbb{E}\|\alpha_{k,r}^k - \alpha_{r-1}\|^2 &\leq \left(1 + \frac{1}{K-1} + 8K\eta_l^2\ell^2\right) (\mathbb{E}\|\mathbf{v}_{k-1,r}^k - \mathbf{v}_{r-1}\|^2 + \mathbb{E}\|\alpha_{k-1,r}^k - \alpha_{r-1}\|^2) \\
 &+ 2\eta_l^2\sigma^2 + 4I\eta_l^2\ell^2\Xi_{r-1} + 4I\eta_l^2\frac{1}{I}\sum_{\tau=1}^I\mathbb{E}[\|\mathbf{v}_{r-1,\tau}^k - \mathbf{v}_{r-1}\|^2 + \|\alpha_{r-1,\tau}^k - \alpha_{r-1}\|^2] \\
 &+ 4I\eta_l^2\mathbb{E}[\|\nabla_{\mathbf{v}}f^s(\mathbf{v}_{r-1}, \alpha_{r-1})\|^2 + \|\nabla_{\alpha}f^s(\mathbf{v}_{r-1}, \alpha_{r-1})\|^2]
 \end{aligned} \tag{92}$$

Taking average over all machines,

$$\begin{aligned}
 &\frac{1}{K}\sum_k\mathbb{E}\|\mathbf{v}_{r,t}^k - \mathbf{v}_{r-1}\|^2 + \mathbb{E}(\alpha_{r,t}^k - \alpha_{r-1})^2 \\
 &\leq \left(1 + \frac{1}{I-1} + 8I\eta_l^2\ell^2\right)\frac{1}{K}\sum_k(\mathbb{E}\|\mathbf{v}_{r,t-1}^k - \mathbf{v}_{r-1}\|^2 + \mathbb{E}(\alpha_{r,t-1}^k - \alpha_{r-1})^2) + 2\eta_l^2\sigma^2 \\
 &\quad + 8I\eta_l^2\ell^2\Xi_{r-1} + 4I\eta_l^2\mathbb{E}[\|\nabla_{\mathbf{v}}f^s(\mathbf{v}_{r-1}, \alpha_{r-1})\|^2 + \|\nabla_{\alpha}f^s(\mathbf{v}_{r-1}, \alpha_{r-1})\|^2] \\
 &\leq (2\eta_l^2\sigma^2 + 8I\eta_l^2\ell^2\Xi_{r-1} + 4I\eta_l^2\mathbb{E}[\|\nabla_{\mathbf{v}}f^s(\mathbf{v}_{r-1}, \alpha_{r-1})\|^2 + (\nabla_{\alpha}f^s(\mathbf{v}_{r-1}, \alpha_{r-1}))^2])\left(\sum_{\tau=0}^{t-1}\left(1 + \frac{1}{I-1} + 8I\eta_l^2\ell^2\right)^\tau\right) \\
 &\leq \left(\frac{2\tilde{\eta}^2\sigma^2}{I^2\eta_g^2} + \frac{8\tilde{\eta}^2\ell^2}{I\eta_g^2}\Xi_{r-1} + \frac{4\tilde{\eta}^2}{I\eta_g^2}\mathbb{E}[\|\nabla_{\mathbf{v}}f^s(\mathbf{v}_{r-1}, \alpha_{r-1})\|^2 + (\nabla_{\alpha}f^s(\mathbf{v}_{r-1}, \alpha_{r-1}))^2]\right)3I \\
 &\leq \left(\frac{\tilde{\eta}\sigma^2}{24\ell I^2\eta_g^2} + \frac{\tilde{\eta}\ell}{3I\eta_g^2}\Xi_{r-1} + \frac{4\tilde{\eta}^2}{I\eta_g^2}\mathbb{E}[\|\nabla_{\mathbf{v}}f^s(\mathbf{v}_{r-1}, \alpha_{r-1})\|^2 + (\nabla_{\alpha}f^s(\mathbf{v}_{r-1}, \alpha_{r-1}))^2]\right)3I
 \end{aligned} \tag{93}$$

Taking average over  $t = 1, \dots, I$ ,

$$\mathcal{E}_r \leq \frac{\tilde{\eta}\sigma^2}{8\ell I\eta_g^2} + \tilde{\eta}\ell\Xi_{r-1} + \frac{12\tilde{\eta}^2}{\eta_g^2}\mathbb{E}[\|\nabla_{\mathbf{v}}f^s(\mathbf{v}_{r-1}, \alpha_{r-1})\|^2 + \|\nabla_{\alpha}f^s(\mathbf{v}_{r-1}, \alpha_{r-1})\|^2] \tag{94}$$

Using (87), we have

$$\mathcal{E}_r \leq \frac{\tilde{\eta}\sigma^2}{8\ell I\eta_g^2} + \tilde{\eta}\ell\Xi_{r-1} + \frac{12\tilde{\eta}^2}{\eta_g^2}\left(4[\|\nabla_{\mathbf{v}}f(\mathbf{v}_r, \alpha_r)\|^2 + \|\nabla_{\alpha}f^s(\mathbf{v}_r, \alpha_r)\|^2] + \frac{\ell^2}{24}\mathcal{E}_r + \frac{\sigma^2}{144KI}\right). \tag{95}$$

Rearranging terms,

$$\mathcal{E}_r \leq \frac{\tilde{\eta}\sigma^2}{2\ell I\eta_g^2} + \tilde{\eta}\ell\Xi_{r-1} + \frac{48\tilde{\eta}^2}{\eta_g^2}[\|\nabla_{\mathbf{v}}f^s(\mathbf{v}_r, \alpha_r)\|^2 + \|\nabla_{\alpha}f^s(\mathbf{v}_r, \alpha_r)\|^2] \tag{96}$$

□

**D.1. Main Proof of Lemma 2**

*Proof.* Plugging Lemma 10 into Lemma 9, we get

$$\begin{aligned}
 & \frac{1}{R} \sum_{r=1}^R [f^s(\mathbf{v}_r, \alpha) - f^s(\mathbf{v}, \alpha_r)] \\
 & \leq \frac{1}{R} \sum_{r=1}^R \underbrace{\left[ \left( \frac{3\ell + 3\ell^2/\mu_2}{2} - \frac{1}{2\tilde{\eta}} \right) \|\mathbf{v}_{r-1} - \mathbf{v}_r\|^2 + \left( 2\ell - \frac{1}{2\tilde{\eta}} \right) \|\alpha_r - \alpha_{r-1}\|^2 \right]}_{C_1} \\
 & + \underbrace{\left( \frac{1}{2\tilde{\eta}} - \frac{\mu_2}{3} \right) \|\alpha_{r-1} - \alpha\|^2 - \left( \frac{1}{2\tilde{\eta}} - \frac{\mu_2}{3} \right) (\alpha_r - \alpha)^2}_{C_2} + \underbrace{\left( \frac{1}{2\tilde{\eta}} - \frac{\ell}{3} \right) \|\mathbf{v}_{r-1} - \mathbf{v}\|^2 - \left( \frac{1}{2\tilde{\eta}} - \frac{\ell}{3} \right) \|\mathbf{v}_r - \mathbf{v}\|^2}_{C_3} \\
 & + \underbrace{\frac{1}{2\tilde{\eta}} ((\alpha - \tilde{\alpha}_{r-1})^2 - (\alpha - \tilde{\alpha}_r)^2)}_{C_4} + \underbrace{\left( \frac{3\ell}{2} + \frac{3\ell^2}{2\mu_2} \right) \mathcal{E}_r}_{C_5} \\
 & + \underbrace{\frac{3\tilde{\eta}}{2} \left\| \frac{1}{KI} \sum_{i,t} [\nabla_{\mathbf{v}} f_k^s(\mathbf{v}_{r,t}^k, \alpha_{r,t}^k) - \nabla_{\mathbf{v}} F_k^s(\mathbf{v}_{r,t}^k, \alpha_{r,t}^k; z_{r,t}^k)] \right\|^2}_{C_6} + \underbrace{\frac{3\tilde{\eta}}{2} \left( \frac{1}{KI} \sum_{i,t} \nabla_{\alpha} f_k^s(\mathbf{v}_{r,t}^k, \alpha_{r,t}^k) - \nabla_{\alpha} F_k^s(\mathbf{v}_{r,t}^k, \alpha_{r,t}^k; z_{r,t}^k) \right)^2}_{C_7}
 \end{aligned} \tag{97}$$

Since  $\tilde{\eta} \leq \min(\frac{1}{3\ell+3\ell^2/\mu_2}, \frac{1}{4\ell}, \frac{3}{2\mu_2})$ , thus in the RHS of (97),  $C_1$  can be cancelled.  $C_2$ ,  $C_3$  and  $C_4$  will be handled by telescoping sum.  $C_5$  can be bounded by Lemma 12.

Taking expectation over  $C_6$ ,

$$\begin{aligned}
 & \mathbb{E} \left[ \frac{3\tilde{\eta}}{2} \left\| \frac{1}{KI} \sum_{i,t} [\nabla_{\mathbf{v}} f_k^s(\mathbf{v}_{r,t}^k, \alpha_{r,t}^k) - \nabla_{\mathbf{v}} F_k^s(\mathbf{v}_{r,t}^k, \alpha_{r,t}^k; z_{r,t}^k)] \right\|^2 \right] \\
 & = \mathbb{E} \left[ \frac{3\tilde{\eta}}{2KI^2} \sum_{i,t} \|\nabla_{\mathbf{v}} f_k^s(\mathbf{v}_{r,t}^k, \alpha_{r,t}^k) - \nabla_{\mathbf{v}} F_k^s(\mathbf{v}_{r,t}^k, \alpha_{r,t}^k; z_{r,t}^k)\|^2 \right] \\
 & \leq \frac{3\tilde{\eta}\sigma^2}{2KI}.
 \end{aligned} \tag{98}$$

The equality is due to

$\mathbb{E}_{r,t} \left\langle \nabla_{\mathbf{v}} f_k^s(\mathbf{v}_{r,t}^k, \alpha_{r,t}^k) - \nabla_{\mathbf{v}} F_k^s(\mathbf{v}_{r,t}^k, \alpha_{r,t}^k; z_{r,t}^k), \nabla_{\mathbf{v}} f_j^s(\mathbf{v}_{r,t}^j, \alpha_{r,t}^j) - \nabla_{\mathbf{v}} F_j^s(\mathbf{v}_{r,t}^j, \alpha_{r,t}^j; z_{r,t}^j) \right\rangle = 0$  for any  $i \neq j$  as each machine draws data independently, where  $\mathbb{E}_{r,t}$  denotes an expectation in round  $r$  conditioned on events until  $k$ . The last inequality holds because  $\|\nabla_{\mathbf{v}} f_k^s(\mathbf{v}_{t-1}^k, \alpha_{t-1}^k) - \nabla_{\mathbf{v}} F_k^s(\mathbf{v}_{t-1}^k, \alpha_{t-1}^k; z_{t-1}^k)\|^2 \leq \sigma^2$  for any  $i$ . Similarly, we take expectation over  $C_7$  and have

$$\mathbb{E} \left[ \frac{3\tilde{\eta}}{2} \left( \frac{1}{NK} \sum_{i,t} [\nabla_{\alpha} f_k^s(\mathbf{v}_{r,t}^k, \alpha_{r,t}^k) - \nabla_{\alpha} F_k^s(\mathbf{v}_{r,t}^k, \alpha_{r,t}^k; z_{r,t}^k)] \right)^2 \right] \leq \frac{3\tilde{\eta}\sigma^2}{2KI}. \tag{99}$$

Plugging (98) and (99) into (97), and taking expectation, it yields

$$\begin{aligned}
 & \frac{1}{R} \sum_r \mathbb{E}[f^s(\mathbf{v}_r, \alpha) - f^s(\mathbf{v}, \alpha_r)] \\
 & \leq \mathbb{E} \left\{ \frac{1}{R} \left( \frac{1}{2\tilde{\eta}} - \frac{\ell_2}{3} \right) \|\mathbf{v}_0 - \mathbf{v}\|^2 + \frac{1}{R} \left( \frac{1}{2\tilde{\eta}} - \frac{\mu_2}{3} \right) \|\alpha_0 - \alpha\|^2 + \frac{1}{2\tilde{\eta}R} \|\mathbf{v}_0 - \mathbf{v}\|^2 + \frac{1}{2\tilde{\eta}R} \|\alpha_0 - \alpha\|^2 \right. \\
 & \quad \left. + \frac{1}{R} \sum_{r=1}^R \left( \frac{3\ell^2}{2\mu_2} + \frac{3\ell}{2} \right) \mathcal{E}_r + \frac{3\tilde{\eta}\sigma^2}{KI} \right\} \\
 & \leq \frac{1}{\tilde{\eta}R} \|\mathbf{v}_0 - \mathbf{v}\|^2 + \frac{1}{\tilde{\eta}R} \|\alpha_0 - \alpha\|^2 + \frac{3\ell^2}{\mu_2} \frac{1}{R} \sum_{r=1}^R \mathcal{E}_r + \frac{3\tilde{\eta}\sigma^2}{KI},
 \end{aligned}$$

where we use  $\mathbf{v}_0 = \bar{\mathbf{v}}_0$ , and  $\alpha_0 = \bar{\alpha}_0$  in the last inequality.

Using Lemma 12,

$$\begin{aligned}
 & \frac{1}{R} \sum_r \mathbb{E}[f^s(\mathbf{v}_r, \alpha) - f^s(\mathbf{v}, \alpha_r)] \\
 & \leq \frac{1}{\tilde{\eta}R} \|\mathbf{v}_0 - \mathbf{v}\|^2 + \frac{1}{\tilde{\eta}R} \|\alpha_0 - \alpha\|^2 + \frac{3\ell^2}{\mu_2} \frac{1}{R} \sum_{r=1}^R \mathcal{E}_r + \frac{3\tilde{\eta}\sigma^2}{KI} \\
 & \leq \frac{1}{\tilde{\eta}R} \|\mathbf{v}_0 - \mathbf{v}\|^2 + \frac{1}{\tilde{\eta}R} \|\alpha_0 - \alpha\|^2 \\
 & \quad + \frac{3\ell^2}{\mu_2} \frac{1}{R} \sum_{r=1}^R \left[ \left( \frac{\tilde{\eta}\sigma^2}{2\ell I \eta_g^2} + \tilde{\eta}\ell \Xi_{r-1} + \frac{48\tilde{\eta}^2}{\eta_g^2} \mathbb{E}[\|\nabla_{\mathbf{v}} f^s(\mathbf{v}_r, \alpha_r)\|^2 + \|\nabla_{\alpha} f^s(\mathbf{v}_r, \alpha_r)\|^2] \right) \right] + \frac{3\tilde{\eta}\sigma^2}{KI} \\
 & \leq \frac{1}{\tilde{\eta}R} \|\mathbf{v}_0 - \mathbf{v}\|^2 + \frac{1}{\tilde{\eta}R} \|\alpha_0 - \alpha\|^2 + \frac{3\tilde{\eta}\ell^3}{\mu_2 R \eta_g^2} \sum_r \Xi_{r-1} + \frac{5\ell}{\mu_2 I \eta_g^2} \tilde{\eta}\sigma^2 + \frac{3000\tilde{\eta}^4 \ell^4}{\mu_2^2 \eta_g^2} \frac{1}{R} \sum_{r=1}^R Gap_r
 \end{aligned}$$

where the last inequality holds because

$$\|\nabla_{\mathbf{v}} f^s(\mathbf{v}_r, \alpha_r)\|^2 + \|\nabla_{\alpha} f^s(\mathbf{v}_r, \alpha_r)\|^2 \leq 9\ell^2 (\|\mathbf{v}_r - \mathbf{v}_{\phi_s}^*\|^2 + \|\alpha_r - \alpha_{\phi_s}^*\|^2) \leq \frac{18\ell^2}{\mu_2} Gap_s(\mathbf{v}_r, \alpha_r). \quad (100)$$

Using Lemma 11,

$$\begin{aligned}
 \Xi_r & \leq 4\mathcal{E}_r + 16\tilde{\eta}^2 [\|\nabla_{\mathbf{v}} f^s(\mathbf{v}_r, \alpha_r)\|^2 + \|\nabla_{\alpha} f^s(\mathbf{v}_r, \alpha_r)\|^2] + \frac{5\tilde{\eta}^2 \sigma^2}{KI} \\
 & \leq 4 \left( \frac{\tilde{\eta}\sigma^2}{2\ell K \eta_g^2} + \tilde{\eta}\ell \Xi_{r-1} + \frac{48\tilde{\eta}^2}{\eta_g^2} [\|\nabla_{\mathbf{v}} f^s(\mathbf{v}_r, \alpha_r)\|^2 + \|\nabla_{\alpha} f^s(\mathbf{v}_r, \alpha_r)\|^2] \right) \\
 & \quad + 16\tilde{\eta}^2 [\|\nabla_{\mathbf{v}} f^s(\mathbf{v}_r, \alpha_r)\|^2 + \|\nabla_{\alpha} f^s(\mathbf{v}_r, \alpha_r)\|^2] + \frac{5\tilde{\eta}\sigma^2}{KI} \\
 & \leq 4\tilde{\eta}\ell \Xi_{r-1} + 160\tilde{\eta}^2 [\|\nabla_{\mathbf{v}} f^s(\mathbf{v}_r, \alpha_r)\|^2 + \|\nabla_{\alpha} f^s(\mathbf{v}_r, \alpha_r)\|^2] + \frac{5\tilde{\eta}\sigma^2}{KI} \left(1 + \frac{K}{\eta_g^2}\right) \\
 & \leq \Xi_{r-1} + 160\tilde{\eta}^2 [\|\nabla_{\mathbf{v}} f^s(\mathbf{v}_r, \alpha_r)\|^2 + \|\nabla_{\alpha} f^s(\mathbf{v}_r, \alpha_r)\|^2] + \frac{5\tilde{\eta}\sigma^2}{KI} \left(1 + \frac{K}{\eta_g^2}\right).
 \end{aligned} \quad (101)$$

Thus,

$$\begin{aligned}
 \frac{2\tilde{\eta}\ell^3}{\mu_2 R \eta_g^2} \sum_{r=1}^R \Xi_r & \leq \frac{2\tilde{\eta}\ell^3}{\mu_2 R \eta_g^2} \sum_r \Xi_{r-1} + \frac{320\tilde{\eta}^3 \ell^3}{\mu_2 R \eta_g^2} \sum_{r=1}^R [\|\nabla_{\mathbf{v}} f^s(\mathbf{v}_r, \alpha_r)\|^2 + \|\nabla_{\alpha} f^s(\mathbf{v}_r, \alpha_r)\|^2] + \frac{5\tilde{\eta}\sigma^2}{KI} \left(1 + \frac{K}{\eta_g^2}\right) \\
 & \leq \frac{2\tilde{\eta}\ell^3}{\mu_2 R \eta_g^2} \sum_r \Xi_{r-1} + \frac{1}{2R} \sum_r Gap_r + \frac{5\tilde{\eta}\sigma^2}{KI} \left(1 + \frac{K}{\eta_g^2}\right)
 \end{aligned} \quad (102)$$



Taking  $A_0 = 0$ ,

$$\begin{aligned} & \frac{1}{R} \sum_r \mathbb{E}[f^s(\mathbf{v}_r, \alpha) - f^s(\mathbf{v}, \alpha_r)] \\ & \leq \frac{1}{\tilde{\eta}R} \|\mathbf{v}_0 - \mathbf{v}\|^2 + \frac{1}{\tilde{\eta}R} \|\alpha_0 - \alpha\|^2 + \frac{1}{2R} \sum_r \text{Gap}_r + \frac{5\tilde{\eta}\sigma^2}{NK} \left(1 + \frac{N}{\eta_g^2}\right) \end{aligned}$$

It follows that

$$\begin{aligned} & \frac{1}{R} \sum_r \mathbb{E}[f^s(\mathbf{v}_r, \alpha) - f^s(\mathbf{v}, \alpha_r)] - \frac{1}{2R} \sum_r \text{Gap}_r \\ & \leq \frac{1}{\tilde{\eta}R} \|\mathbf{v}_0 - \mathbf{v}\|^2 + \frac{1}{\tilde{\eta}R} \|\alpha_0 - \alpha\|^2 + \frac{5\tilde{\eta}\sigma^2}{KI} \left(1 + \frac{K}{\eta_g^2}\right). \end{aligned}$$

Sample a  $\tilde{r}$  from  $1, \dots, R$ , we have

$$\mathbb{E}[\text{Gap}_{\tilde{r}}^s] \leq \frac{2}{\tilde{\eta}R} \|\mathbf{v}_0 - \mathbf{v}\|^2 + \frac{2}{\tilde{\eta}R} \|\alpha_0 - \alpha\|^2 + \frac{10\tilde{\eta}\sigma^2}{KI} \left(1 + \frac{K}{\eta_g^2}\right). \quad (103)$$

□

## E. Proof of Theorem 2

*Proof.* Since  $f(\mathbf{v}, \alpha)$  is  $\ell$ -weakly convex in  $\mathbf{v}$  for any  $\alpha$ ,  $\phi(\mathbf{v}) = \max_{\alpha'} f(\mathbf{v}, \alpha')$  is also  $\ell$ -weakly convex. Taking  $\gamma = 2\ell$ , we have

$$\begin{aligned} \phi(\mathbf{v}_{s-1}) & \geq \phi(\mathbf{v}_s) + \langle \partial\phi(\mathbf{v}_s), \mathbf{v}_{s-1} - \mathbf{v}_s \rangle - \frac{\ell}{2} \|\mathbf{v}_{s-1} - \mathbf{v}_s\|^2 \\ & = \phi(\mathbf{v}_s) + \langle \partial\phi(\mathbf{v}_s) + 2\ell(\mathbf{v}_s - \mathbf{v}_{s-1}), \mathbf{v}_{s-1} - \mathbf{v}_s \rangle + \frac{3\ell}{2} \|\mathbf{v}_{s-1} - \mathbf{v}_s\|^2 \\ & \stackrel{(a)}{=} \phi(\mathbf{v}_s) + \langle \partial\phi_s(\mathbf{v}_s), \mathbf{v}_{s-1} - \mathbf{v}_s \rangle + \frac{3\ell}{2} \|\mathbf{v}_{s-1} - \mathbf{v}_s\|^2 \\ & \stackrel{(b)}{=} \phi(\mathbf{v}_s) - \frac{1}{2\ell} \langle \partial\phi_s(\mathbf{v}_s), \partial\phi_s(\mathbf{v}_s) - \partial\phi(\mathbf{v}_s) \rangle + \frac{3}{8\ell} \|\partial\phi_s(\mathbf{v}_s) - \partial\phi(\mathbf{v}_s)\|^2 \\ & = \phi(\mathbf{v}_s) - \frac{1}{8\ell} \|\partial\phi_s(\mathbf{v}_s)\|^2 - \frac{1}{4\ell} \langle \partial\phi_s(\mathbf{v}_s), \partial\phi(\mathbf{v}_s) \rangle + \frac{3}{8\ell} \|\partial\phi(\mathbf{v}_s)\|^2, \end{aligned} \quad (104)$$

where (a) and (b) hold by the definition of  $\phi_s(\mathbf{v})$ .

Rearranging the terms in (104) yields

$$\begin{aligned} \phi(\mathbf{v}_s) - \phi(\mathbf{v}_{s-1}) & \leq \frac{1}{8\ell} \|\partial\phi_s(\mathbf{v}_s)\|^2 + \frac{1}{4\ell} \langle \partial\phi_s(\mathbf{v}_s), \partial\phi(\mathbf{v}_s) \rangle - \frac{3}{8\ell} \|\partial\phi(\mathbf{v}_s)\|^2 \\ & \stackrel{(a)}{\leq} \frac{1}{8\ell} \|\partial\phi_s(\mathbf{v}_s)\|^2 + \frac{1}{8\ell} (\|\partial\phi_s(\mathbf{v}_s)\|^2 + \|\partial\phi(\mathbf{v}_s)\|^2) - \frac{3}{8\ell} \|\partial\phi(\mathbf{v}_s)\|^2 \\ & = \frac{1}{4\ell} \|\partial\phi_s(\mathbf{v}_s)\|^2 - \frac{1}{4\ell} \|\partial\phi(\mathbf{v}_s)\|^2 \\ & \stackrel{(b)}{\leq} \frac{1}{4\ell} \|\partial\phi_s(\mathbf{v}_s)\|^2 - \frac{\mu}{2\ell} (\phi(\mathbf{v}_s) - \phi(\mathbf{v}_{\phi_s}^*)) \end{aligned} \quad (105)$$

where (a) holds by using  $\langle \mathbf{a}, \mathbf{b} \rangle \leq \frac{1}{2}(\|\mathbf{a}\|^2 + \|\mathbf{b}\|^2)$ , and (b) holds by the  $\mu$ -PL property of  $\phi(\mathbf{v})$ .

Thus, we have

$$(4\ell + 2\mu) (\phi(\mathbf{v}_s) - \phi(\mathbf{v}_*)) - 4\ell(\phi(\mathbf{v}_{s-1}) - \phi(\mathbf{v}_{\phi_s}^*)) \leq \|\partial\phi_s(\mathbf{v}_s)\|^2. \quad (106)$$

Since  $\gamma = 2\ell$ ,  $f_s(\mathbf{v}, \alpha)$  is  $\ell$ -strongly convex in  $\mathbf{v}$  and  $\mu_2$  strong concave in  $\alpha$ . Apply Lemma 3 to  $f_s$ , we know that

$$\frac{\ell}{4} \|\hat{\mathbf{v}}_s(\alpha_s) - \mathbf{v}_0^s\|^2 + \frac{\mu_2}{4} \|\hat{\alpha}_s(\mathbf{v}_s) - \alpha_0^s\|^2 \leq \text{Gap}_s(\mathbf{v}_0^s, \alpha_0^s) + \text{Gap}_s(\mathbf{v}_s, \alpha_s). \quad (107)$$

By the setting of  $\tilde{\eta}_s$ ,  $I_s = I_0 * 2^s$ , and  $R_s = \frac{1000}{\tilde{\eta} \min(\ell, \mu_2)}$ , we note that  $\frac{4}{\tilde{\eta} R_s} \leq \frac{\min\{\ell, \mu_2\}}{212}$ . Applying Lemma (2), we have

$$\begin{aligned} \mathbb{E}[\text{Gap}_s(\mathbf{v}_s, \alpha_s)] &\leq \frac{10\tilde{\eta}\sigma^2}{KI_02^s} + \frac{1}{53} \mathbb{E} \left[ \frac{\ell}{4} \|\hat{\mathbf{v}}_s(\alpha_s) - \mathbf{v}_0^s\|^2 + \frac{\mu_2}{4} \|\hat{\alpha}_s(\mathbf{v}_s) - \alpha_0^s\|^2 \right] \\ &\leq \frac{10\tilde{\eta}\sigma^2}{KI_02^s} + \frac{1}{53} \mathbb{E} [\text{Gap}_s(\mathbf{v}_0^s, \alpha_0^s) + \text{Gap}_s(\mathbf{v}_s, \alpha_s)]. \end{aligned} \quad (108)$$

Since  $\phi(\mathbf{v})$  is  $L$ -smooth and  $\gamma = 2\ell$ , then  $\phi_k(\mathbf{v})$  is  $\hat{L} = (L + 2\ell)$ -smooth. According to Theorem 2.1.5 of (Nesterov, 2004), we have

$$\begin{aligned} \mathbb{E}[\|\partial\phi_s(\mathbf{v}_s)\|^2] &\leq 2\hat{L}\mathbb{E}(\phi_s(\mathbf{v}_s) - \min_{x \in \mathbb{R}^d} \phi_s(\mathbf{v})) \leq 2\hat{L}\mathbb{E}[\text{Gap}_s(\mathbf{v}_s, \alpha_s)] \\ &= 2\hat{L}\mathbb{E}[4\text{Gap}_s(\mathbf{v}_s, \alpha_s) - 3\text{Gap}_s(\mathbf{v}_s, \alpha_s)] \\ &\leq 2\hat{L}\mathbb{E} \left[ 4 \left( \frac{10\tilde{\eta}\sigma^2}{KI_02^s} + \frac{1}{53} (\text{Gap}_s(\mathbf{v}_0^s, \alpha_0^s) + \text{Gap}_s(\mathbf{v}_s, \alpha_s)) \right) - 3\text{Gap}_s(\mathbf{v}_s, \alpha_s) \right] \\ &= 2\hat{L}\mathbb{E} \left[ 40 \frac{\tilde{\eta}\sigma^2}{KI_02^s} + \frac{4}{53} \text{Gap}_s(\mathbf{v}_0^s, \alpha_0^s) - \frac{155}{53} \text{Gap}_s(\mathbf{v}_s, \alpha_s) \right]. \end{aligned} \quad (109)$$

Applying Lemma 4 to (109), we have

$$\begin{aligned} \mathbb{E}[\|\partial\phi_s(\mathbf{v}_s)\|^2] &\leq 2\hat{L}\mathbb{E} \left[ \frac{40\tilde{\eta}\sigma^2}{KI_02^s} + \frac{4}{53} \text{Gap}_s(\mathbf{v}_0^s, \alpha_0^s) \right. \\ &\quad \left. - \frac{155}{53} \left( \frac{3}{50} \text{Gap}_{s+1}(\mathbf{v}_0^{s+1}, \alpha_0^{s+1}) + \frac{4}{5} (\phi(\mathbf{v}_0^{s+1}) - \phi(\mathbf{v}_0^s)) \right) \right] \\ &= 2\hat{L}\mathbb{E} \left[ 40 \frac{\tilde{\eta}\sigma^2}{KI_02^s} + \frac{4}{53} \text{Gap}_s(\mathbf{v}_0^s, \alpha_0^s) - \frac{93}{530} \text{Gap}_{s+1}(\mathbf{v}_0^{s+1}, \alpha_0^{s+1}) - \frac{124}{53} (\phi(\mathbf{v}_0^{s+1}) - \phi(\mathbf{v}_0^s)) \right]. \end{aligned} \quad (110)$$

Combining this with (106), rearranging the terms, and defining a constant  $c = 4\ell + \frac{248}{53}\hat{L} \in O(L + \ell)$ , we get

$$\begin{aligned} &(c + 2\mu) \mathbb{E}[\phi(\mathbf{v}_0^{s+1}) - \phi(\mathbf{v}_*)] + \frac{93}{265} \hat{L} \mathbb{E}[\text{Gap}_{s+1}(\mathbf{v}_0^{s+1}, \alpha_0^{s+1})] \\ &\leq \left( 4\ell + \frac{248}{53} \hat{L} \right) \mathbb{E}[\phi(\mathbf{v}_0^s) - \phi(\mathbf{v}_*)] + \frac{8\hat{L}}{53} \mathbb{E}[\text{Gap}_s(\mathbf{v}_0^s, \alpha_0^s)] + \frac{80\hat{L}\tilde{\eta}\sigma^2}{KI_02^s} \\ &\leq c \mathbb{E} \left[ \phi(\mathbf{v}_0^s) - \phi(\mathbf{v}_*) + \frac{8\hat{L}}{53c} \text{Gap}_s(\mathbf{v}_0^s, \alpha_0^s) \right] + \frac{80\hat{L}\tilde{\eta}\sigma^2}{KI_02^s}. \end{aligned} \quad (111)$$

Using the fact that  $\hat{L} \geq \mu$ ,

$$(c + 2\mu) \frac{8\hat{L}}{53c} = \left( 4\ell + \frac{248}{53} \hat{L} + 2\mu \right) \frac{8\hat{L}}{53(4\ell + \frac{248}{53} \hat{L})} \leq \frac{8\hat{L}}{53} + \frac{16\mu_1\hat{L}}{248\hat{L}} \leq \frac{93}{265} \hat{L}. \quad (112)$$

Then, we have

$$\begin{aligned} &(c + 2\mu_1) \mathbb{E} \left[ \phi(\mathbf{v}_0^{s+1}) - \phi(\mathbf{v}_*) + \frac{8\hat{L}}{53c} \text{Gap}_{s+1}(\mathbf{v}_0^{s+1}, \alpha_0^{s+1}) \right] \\ &\leq c \mathbb{E} \left[ \phi(\mathbf{v}_0^s) - \phi(\mathbf{v}_*) + \frac{8\hat{L}}{53c} \text{Gap}_s(\mathbf{v}_0^s, \alpha_0^s) \right] + \frac{80\hat{L}\tilde{\eta}\sigma^2}{KI_02^s}. \end{aligned} \quad (113)$$

Defining  $\Delta_s = \phi(\mathbf{v}_0^s) - \phi(\mathbf{v}^*) + \frac{8\hat{L}}{53c} \text{Gap}_s(\mathbf{v}_0^s, \alpha_0^s)$ , then

$$\mathbb{E}[\Delta_{s+1}] \leq \frac{c}{c+2\mu} \mathbb{E}[\Delta_s] + \frac{80\hat{L}}{c+2\mu} \frac{\tilde{\eta}\sigma^2}{KI_0 2^s} \quad (114)$$

Using this inequality recursively, it yields

$$\begin{aligned} E[\Delta_{S+1}] &\leq \left(\frac{c}{c+2\mu}\right)^S E[\Delta_1] + \frac{80\hat{L}}{c+2\mu} \frac{\tilde{\eta}\sigma^2}{KI_0} \sum_{s=1}^S \left(\exp\left(-\frac{2\mu}{c+2\mu}(s-1)\right)\right) \left(\frac{c}{c+2\mu}\right)^{S+1-s} \\ &\leq 2\epsilon_0 \exp\left(\frac{-2\mu S}{c+2\mu}\right) + \frac{80\tilde{\eta}\hat{L}\sigma^2}{(c+2\mu)KI_0} S \exp\left(-\frac{2\mu S}{c+2\mu}\right), \end{aligned} \quad (115)$$

where the second inequality uses the fact  $1-x \leq \exp(-x)$ , and

$$\begin{aligned} \Delta_1 &= \phi(\mathbf{v}_0^1) - \phi(\mathbf{v}^*) + \frac{8\hat{L}}{53c} \text{Gap}_1(\mathbf{v}_0^1, \alpha_0^1) \\ &= \phi(\mathbf{v}_0) - \phi(\mathbf{v}^*) + \left(f(\mathbf{v}_0, \hat{\alpha}_1(\mathbf{v}_0)) + \frac{\gamma}{2} \|\mathbf{v}_0 - \mathbf{v}_0\|^2 - f(\hat{\mathbf{v}}_1(\alpha_0), \alpha_0) - \frac{\gamma}{2} \|\hat{\mathbf{v}}_1(\alpha_0) - \mathbf{v}_0\|^2\right) \\ &\leq \epsilon_0 + f(\mathbf{v}_0, \hat{\alpha}_1(\mathbf{v}_0)) - f(\hat{\mathbf{v}}_1(\alpha_0), \alpha_0) \leq 2\epsilon_0. \end{aligned} \quad (116)$$

To make this less than  $\epsilon$ , it suffices to make

$$\begin{aligned} 2\epsilon_0 \exp\left(\frac{-2\mu S}{c+2\mu}\right) &\leq \frac{\epsilon}{2} \\ \frac{80\tilde{\eta}\hat{L}\sigma^2}{(c+2\mu)KI_0} S \exp\left(-\frac{2\mu S}{c+2\mu}\right) &\leq \frac{\epsilon}{2} \end{aligned} \quad (117)$$

Let  $S$  be the smallest value such that  $\exp\left(\frac{-2\mu S}{c+2\mu}\right) \leq \min\left\{\frac{\epsilon}{4\epsilon_0}, \frac{(c+2\mu)\epsilon}{160\hat{L}S} \frac{KI_0}{\tilde{\eta}\sigma^2}\right\}$ . We can set  $S$  to be the smallest value such that  $S > \max\left\{\frac{c+2\mu}{2\mu} \log \frac{4\epsilon_0}{\epsilon}, \frac{c+2\mu}{2\mu} \log \frac{160\hat{L}S}{(c+2\mu)\epsilon} \frac{\tilde{\eta}\sigma^2}{KI_0}\right\}$ .

Then, the total communication complexity is

$$\sum_{s=1}^S R_s \leq O\left(\frac{1000}{\tilde{\eta}\mu_2} S\right) \leq \tilde{O}\left(\frac{1}{\tilde{\eta}\mu_2} \frac{c}{\mu}\right) \leq \tilde{O}\left(\frac{1}{\mu}\right).$$

Total iteration complexity is

$$\begin{aligned} \sum_{s=1}^S T_s &= \sum_{s=1}^S R_s I_s \\ &= \sum_{s=1}^S R_s I_0 \exp\left(\frac{2\mu}{c+2\mu}(s-1)\right) = O\left(I_0 \sum_s \exp\left(\frac{2\mu}{c+2\mu}(s-1)\right)\right) \\ &= \tilde{O}\left(I_0 \frac{\exp\left(\frac{2\mu}{c+2\mu} S\right)}{\exp\left(\frac{2\mu}{c+2\mu}\right)}\right) \\ &= \tilde{O}\left(\frac{c}{\mu_2^2 \mu} \left(\frac{\epsilon_0}{\epsilon}, \frac{S\tilde{\eta}\sigma^2}{I_0 K \epsilon}\right)\right) \\ &= \tilde{O}\left(\max\left(\frac{1}{\mu\epsilon}, \frac{c^2}{\mu^2} \frac{\tilde{\eta}\sigma^2}{K}\right)\right) = \tilde{O}\left(\max\left(\frac{1}{\mu\epsilon}, \frac{1}{K\mu^2\epsilon}\right)\right), \end{aligned} \quad (118)$$

which is also the sample complexity on each single machine.  $\square$

## F. More Results

In this section, we report more experiment results for  $\text{imratio}=30\%$  with DenseNet121 on ImageNet-IH, and CIFAR100-IH in Figure 2,3 and 4. We also verify the proposed CODASCA using stagewise  $I = I_0 \times 3^{(s-1)}$ , where  $s$  is the stage number, indicating that all machines will communicate less frequently at later stages during training. The results for  $\text{imratio}=10\%$  and  $K=16$  with DenseNet121 on ImageNet-IH, and CIFAR100-IH are included in Figure 5. In addition, we conduct experiments on imbalanced heterogeneous CIFAR100 from the same sample set for  $K=16$  and  $K=8$  and the results are included in Figure 6 and Figure 7.

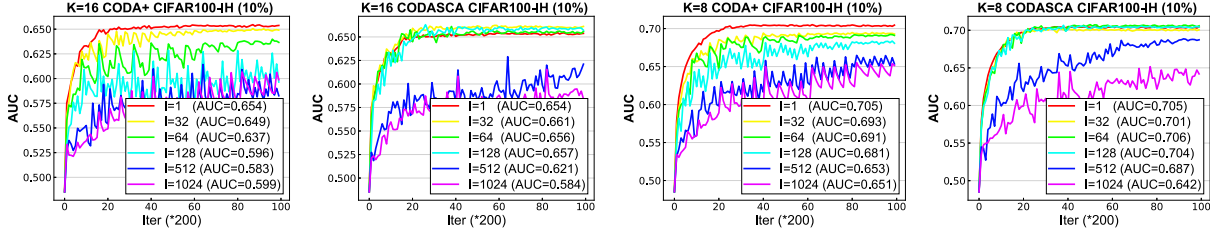

Figure 2. Imbalanced Heterogeneous CIFAR100 with  $\text{imratio} = 10\%$  and  $K=16,8$  on Densenet121.

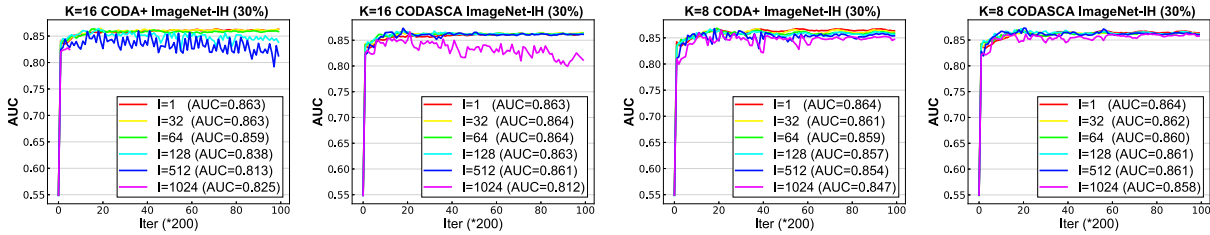

Figure 3. Imbalanced Heterogeneous ImageNet with  $\text{imratio} = 30\%$  and  $K=16,8$  on Densenet121.

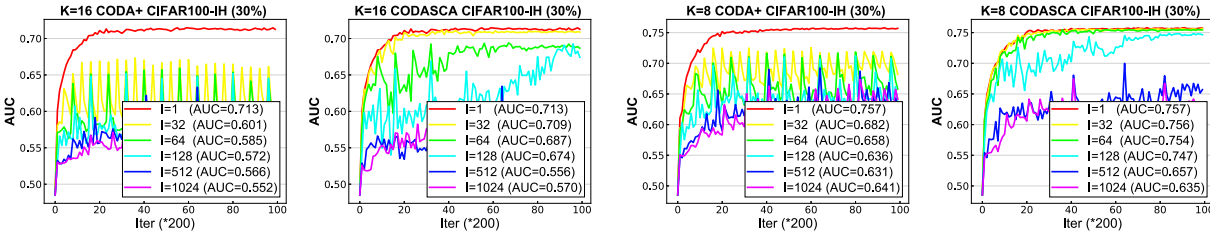

Figure 4. Imbalanced Heterogeneous CIFAR100 with  $\text{imratio} = 30\%$  and  $K=16,8$  on Densenet121.

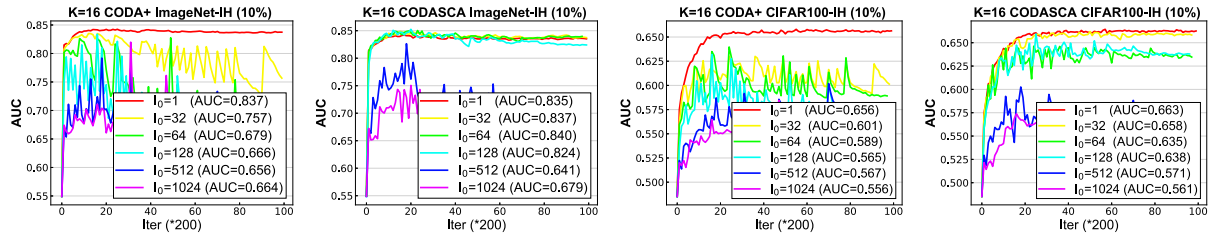

Figure 5. Imbalanced Heterogeneous ImageNet, CIFAR100 with  $\text{imratio} = 10\%$ ,  $K=16$  and increasing  $I$  on Densenet121.

## Federated Deep AUC Maximization with a Constant Communication Complexity

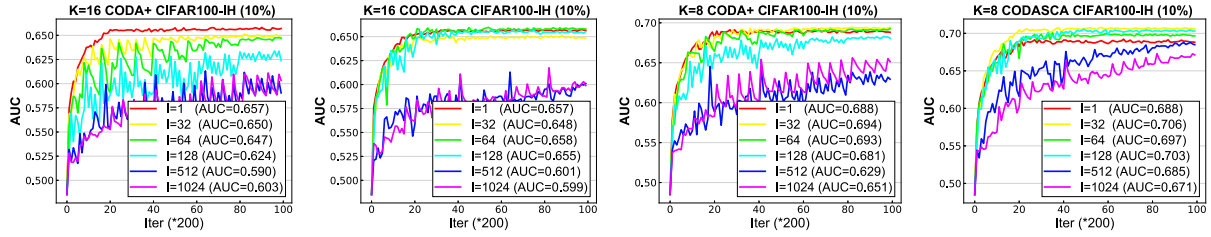

Figure 6. Imbalanced Heterogeneous CIFAR100 with imratio = 10%, K=16,8 on Densenet121.

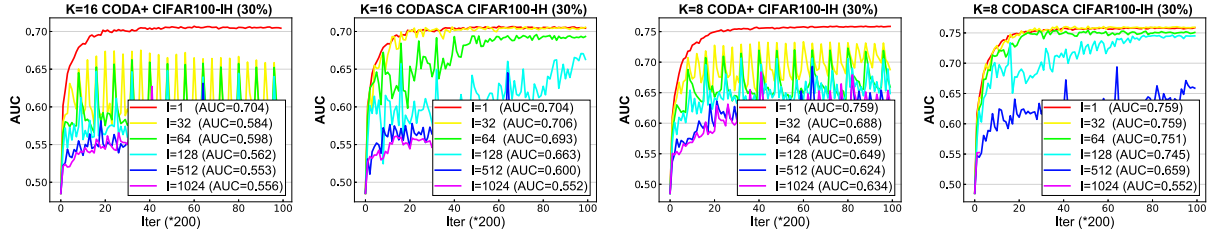

Figure 7. Imbalanced Heterogeneous CIFAR100 with imratio = 30%, K=16,8 on Densenet121.

## G. Descriptions of Datasets

Table 6. Statistics of Medical Chest X-ray Datasets. The numbers for each disease indicate the imbalance ratio (imratio).

| Dataset     | Source                    | Samples | Cardiomegaly | Edema | Consolidation | Atelectasis | Effusion |
|-------------|---------------------------|---------|--------------|-------|---------------|-------------|----------|
| CheXpert    | Stanford Hospital (US)    | 224,316 | 0.211        | 0.342 | 0.120         | 0.310       | 0.414    |
| ChestXray8  | NIH Clinical Center (US)  | 112,120 | 0.025        | 0.021 | 0.042         | 0.103       | 0.119    |
| PadChest    | Hospital San Juan (Spain) | 110,641 | 0.089        | 0.012 | 0.015         | 0.056       | 0.064    |
| MIMIC-CXR   | BIDMC (US)                | 377,110 | 0.196        | 0.179 | 0.047         | 0.246       | 0.237    |
| ChestXrayAD | H108 and HMUH (Vietnam)   | 15,000  | 0.153        | 0.000 | 0.024         | 0.012       | 0.069    |
